RESEARCH ARTICLE

# Place of death for people with dementia: A scoping review

Paula Hidalgo-Andrade<sup>1</sup>✉, Alejandro Unda-López<sup>1</sup>✉, Tania Pastrana<sup>2,3\*</sup>

**1** Grupo de investigación Bienestar, Salud y Sociedad, Universidad de Las Américas, Campus UDLAPARK, Quito, Ecuador, **2** Department of Palliative Medicine, Medical Faculty, RWTH Aachen University, Germany, **3** International Association for Hospice and Palliative Care (IAHPC), Houston, Texas, USA

✉ The authors contributed equally to this work.

\* [paula.hidalgo@udla.edu.ec](mailto:paula.hidalgo@udla.edu.ec)

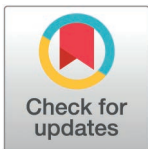

## Abstract

### Background

Dementia is a global health concern that contributes significantly to severe health-related suffering and poses high demands on healthcare systems, patients, families, and caregivers. Caring for people with dementia should include all the stages of illness, including end-of-life care.

### Aim

Given that the place of death is a crucial aspect of end-of-life care, we aimed to analyze the scientific literature on the place of death of individuals with dementia, the sociodemographic and contextual variables associated with it, and evidence-based suggestions to improve end-of-life care for people with dementia.

### Methods

We conducted a scoping review in 19 databases in November 2023 and updated the search in February 2025, yielding 1590 and 660 sources of evidence, respectively. Manuscripts had to a) focus on the frequency of more than one place of death, b) include population with dementia, c) use administrative data, and d) be published in peer-reviewed primary sources to be included in this study. The procedure for searching the sources of evidence and data charting was based on the structured approach for conducting scoping reviews by Arksey and O'Malley. Pre-registration can be retrieved at <https://doi.org/10.17605/OSF.IO/BVXMY>.

### Results

After screening, a total of 48 studies were included in this review. Results indicate a great variability in the place of death of people with dementia across different regions

## OPEN ACCESS

**Citation:** Hidalgo-Andrade P, Unda-López A, Pastrana T (2026) Place of death for people with dementia: A scoping review. PLoS One 21(1): e0340024. <https://doi.org/10.1371/journal.pone.0340024>

**Editor:** Sascha Köpke, University Hospital Cologne: Uniklinik Köln, GERMANY

**Received:** September 5, 2024

**Accepted:** December 15, 2025

**Published:** January 9, 2026

**Copyright:** © 2026 Hidalgo-Andrade et al. This is an open access article distributed under the terms of the [Creative Commons Attribution License](https://creativecommons.org/licenses/by/4.0/), which permits unrestricted use, distribution, and reproduction in any medium, provided the original author and source are credited.

**Data availability statement:** All relevant data are within the manuscript and its [Supporting Information](#) files.

**Funding:** Support for this research was provided by a scholarship awarded to PHA in the program "Research Stays for Academics and Scientists, 2023" of the German Academic

Exchange Service (DAAD, ID: 57681226) The funders had no role in study design, data collection and analysis, the decision to publish, or the preparation of the manuscript.

**Competing interests:** The authors declare no potential conflicts of interest regarding the research, authorship, and/or publication of this article.

and settings. Overall, in Europe and North America, it was more common for people with dementia to die in long-term care facilities like care homes, nursing homes, and sheltered housing; in East Asia and the Pacific, medical facilities (i.e., hospitals, mental health facilities, and private clinics) were more common. Studies that showed trends also indicate an increase in long-term-care facilities and a decrease in medical facilities and homes as the place of death. Most studies were conducted in high-income countries, raising questions about the diverse factors that may influence the place of death, such as access to services and socioeconomic status.

## Discussion

These results could inform decisions on allocating resources and training for end-of-life care for people with dementia. However, more research is needed to increase the representativeness of other world regions and understand other variables that influence the place of death.

## Introduction

Dementia is a progressive neurodegenerative noncommunicable disease that affects over 55 million people worldwide [1]. Its prevalence has increased primarily due to population growth and extended life expectancies resulting from advancements in healthcare [2,3]. It is a global health concern, ranking among the leading causes of care dependency and disability [3], significantly contributing to severe health-related suffering [4,5], and increasing the demands on healthcare systems and families or caregivers [6]. These characteristics make dementia care particularly complex.

As dementia advances to severe stages, individuals experience significant impairments in memory, judgment, and decision-making capacity, often rendering them unable to express their symptoms, preferences, or discomfort [7]. Additionally, people with dementia (PwD) often suffer from multiple additional diseases or comorbidities [8], including infections, delirium, aspiration pneumonia, among others. These conditions require an individualized and sensitive approach to care that balances symptom management, psychological support, and ethical considerations such as autonomy and dignity [9]. The needs of PwD and their families also include end-of-life care and the alignment between preferred and actual place of death (PoD) [10]. Ideally, PwD and their families should have the autonomy to choose where they die, with every location providing high-quality end-of-life care characterized by adequate symptom management and access to treatments [10,11]. The preferred PoD is used as a quality indicator for end-of-life care [12]. Studying PoD allows healthcare providers and policymakers to better understand, plan, and improve the care of PwD as well as to address the issues surrounding death.

Research indicates variability in PoD of PwD among countries, potentially linked to differences in the organization of end-of-life care provision [13]. The World Health Organization recommends that dementia care be integrated into national health plans, policies, and legislation to enhance support for PwD and their families, while

also alleviating the burden on health systems [3]. Relevant information is needed to make informed decisions and adhere to those recommendations. However, the complexity of caring for PwD and various other factors may influence the place of care and PoD. A recent study showed that 10 factors influence the PoD of individuals with advanced dementia: age, gender, ethnicity, presence of pneumonia, chronic obstructive pulmonary disease, cancer, functional status, marital status, urbanization level, and funding [14].

Cultural and social factors have also been further studied in relation to PoD. The interplay of cultural values, healthcare infrastructure, familial and community support networks, and cultural attitudes toward caregiving can influence where individuals with dementia die. In Taiwan, for example, a study showed that the high prevalence of home deaths (not only of PwD) has been partly attributed to the practice of “impending death discharge”, wherein terminally ill individuals are released from hospitals to die at home following Chinese cultural traditions [15].

A recently published meta-analysis conducted by Tay and colleagues [14] offers a rigorous quantitative synthesis of evidence up to 2022 and focuses narrowly on the factors associated with PoD in people with advanced dementia. Our scoping review addresses broader research questions and incorporates diverse study designs, populations, and outcomes to offer current, contextual insights essential for understanding the PoD of PwD in recent evidence. Specifically, this scoping review expands on this by addressing three broader questions:

- 1) Where do PwD die?
- 2) Which sociodemographic and contextual variables explain variations in the PoD of PwD?
- 3) What evidence-based suggestions can be drawn from the research to improve end-of-life care provision for PwD?

## Methods

The present scoping follows the PRISMA extension for scoping reviews (PRISMA-ScR) guidelines [16] (Supplementary Material 1).

### Protocol and registration

We conducted a scoping review, ideal for identifying the scope or coverage within an existing body of literature and providing an overview of a studied topic [17]. This review pre-registration is available on the Open Science Framework (OSF) platform (<https://doi.org/10.17605/OSF.IO/BVXMY>). The final study had two deviations from the study registration. First, we did not address the question of PoD preferences because, after data extraction, we noticed that information on this subject was missing. As no results were drawn, the question was not addressed. Second, the planned quality assessment was not conducted because, as scoping reviews’ objectives center on mapping the existing evidence, no quality appraisal was deemed necessary. The procedure for searching the sources of evidence and data charting was based on the six-stage framework by Arksey and O’Malley [18]. The primary and secondary research questions were established for the first stage. For the second stage, databases were selected to identify and retrieve relevant studies based on their affinity with the topic studied and the coverage of evidence sources.

### Eligibility criteria

To be included in the review, manuscripts had to meet all the following inclusion criteria: 1) Focus on the distribution of more than one PoD of people with dementia. 2) be a peer-reviewed published manuscript; and 3) use administrative data (information gathered and maintained by government agencies or official organizations for administrative purposes). Articles that focused solely on pre-senile dementia were excluded from the present review, as the term and diagnosis are outdated. This term was used to frame cognitive impairments, especially memory loss, as a natural consequence of ageing rather than the result of a disorder [19,20], and has been used ambiguously to refer either to symptomatology associated

with Alzheimer’s disease or non-specific losses in cognitive function [20]. As these diagnoses are inconsistently applied through the literature, such populations may not be representative of typical patients dying with dementia, and end-of-life care considerations may not be comparable. No study design, date limit, or language was considered as a criterion. For articles in languages not spoken by the authors, AI tools were implemented for translation.

### Information sources

A search was conducted on 19 databases (see Fig 1) from November 4 to November 9, 2023, to identify publications. A second search was conducted between February 9 and February 12, 2025, to update the sources of evidence included.

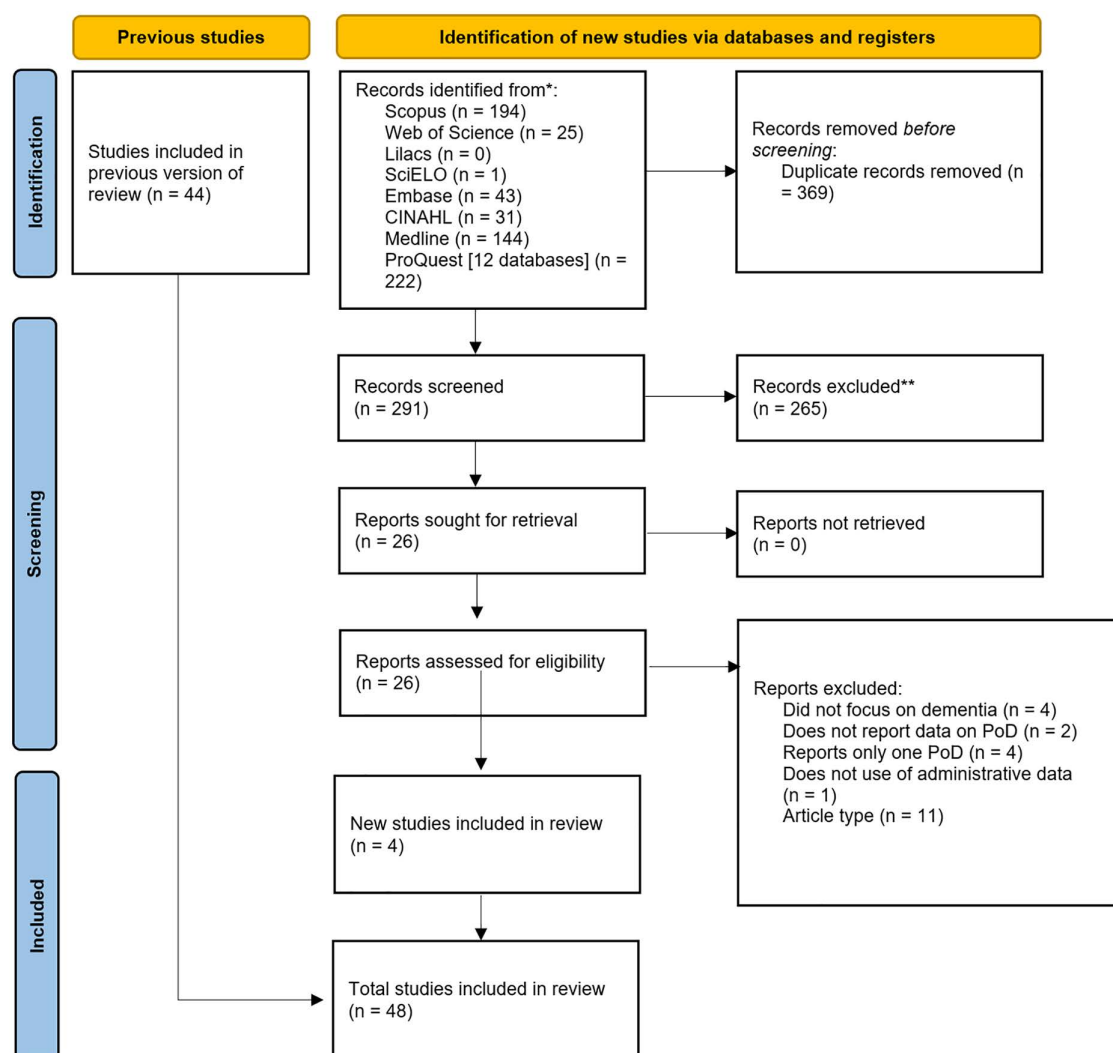

**Fig 1. PRISMA 2020 flow diagram for updated searches [26].** \*Databases [12] accessed through the ProQuest interface were PsycINFO (APA), PRISMA Database (1966—current), Biological Science Database, Health & Medical Collection, Healthcare Administration Database, Latin America & Iberia Database, Nursing & Allied Health Database, Psychology Database, Public Health Database, Publicly Available Content Database, Social Science Database, and Sociology Database (1985—current).

<https://doi.org/10.1371/journal.pone.0340024.g001>

## Search

The search string contains terms related to dementia and PoD (refer to pre-registration for specific queries in each database). An example of the query used (for Scopus) can be seen next:

**Query string:** TITLE-ABS-KEY(dementia OR alzheimer's OR alzheimer OR "alzheimer's disease" OR "senile dementia" OR demented) AND TITLE-ABS-KEY("place of death" OR "death place" OR "site of death" OR "location of death" OR "home death" OR "hospital death" OR "inpatient death" OR "nursing home death" OR "hospice death" OR "aged care home death" OR "residential care home death").

## Selection of sources of evidence

In the third stage, we conducted an initial review, excluding articles that did not meet the inclusion criteria. Sysrev (<http://www.sysrev.com>), a collaborative working platform useful in several stages of conducting reviews, was used for data management and screening. Two researchers (PHA, AUL) conducted the screening in three steps: 1) Duplicates were removed, 2) two reviewers independently screened titles and abstracts against inclusion criteria, and 3) full texts were retrieved and assessed independently for final inclusion. Discrepancies between all researchers were discussed after steps two and three.

## Data charting process

For the fourth stage, data were charted using an online form created for this study. Three researchers (PHA, TP, AUL) conducted data extraction independently, and discrepancies were discussed in team meetings.

## Data items

To describe the characteristics of the included studies, data from journal details (name and journal region), manuscript information (title, year of publication, and language), and research information (aim, study design, and context) were extracted.

The following data were charted to answer the present research questions. For the first research question, items aimed at attaining data on sample characteristics, study location(s), participants' country of origin, and significant results on the PoD. To approach the second question, data regarding sociodemographic characteristics, type of dementia, and factors associated with PoD were extracted. And for the third question, charted data focused on reported conclusions, limitations, and suggestions or recommendations for theory and practice.

## Critical appraisal

There is an ongoing debate on whether quality appraisal is part of a scoping review process [21], although it is suggested that not conducting this step may be presented as a limitation in this methodology [18]. The present review aimed to review peer-reviewed papers with non-experimental designs using administrative data. As scoping reviews provide an overview of the evidence within a given topic [22], quality appraisal was not conducted to avoid further limiting the inclusion of potentially relevant studies.

## Synthesis of results

In the fifth stage, data obtained from included articles were collated and summarized using a spreadsheet. An inductive approach was used for identifying trends in the data. All team members were involved in this stage. Disagreements were resolved during team meetings. Synthesis of results was presented based on the PRISMA-ScR guidelines and followed the same order as the research questions presented above. Additionally, we performed some data transformations. First, when information on the frequency/percentage of PoD was not directly available, we calculated it whenever possible.

Second, given the heterogeneity in PoD reports, we reclassified them into the following categories: 'Home', 'Medical facilities' (MF), 'Long-term care facilities' (LTCF), 'Palliative care facilities' (PCF), and 'Elsewhere'. [Table 1](#) presents the specific locations reported by the included studies and their categorization within each new category.

## Results

### Selection of sources of evidence

The first search yielded a total of 1590 manuscripts, of which 963 were duplicates. 627 records were screened in the first stage, and 112 manuscripts were assessed for eligibility. A total of 44 studies reached the charting stage. For the second search conducted, a total of 660 manuscripts were identified, 26 were assessed for eligibility, and 4 studies reached the final stage. [Fig 1](#) shows the selection of sources of evidence for the updated search.

### Sample characteristics

After the selection process, 48 articles were included (see [Fig 1](#)), with samples ranging from 147 [\[27\]](#) to 3,291,422 [\[28\]](#). The overall age ranged from 41 to 110 years; additionally, studies focused on male and female participants alike, except for a study that only included male participants with dementia [\[29\]](#).

Data on dementia-related diagnoses were collected to ensure comparability of the studies. Thirty-one studies reported using diagnoses from the International Statistical Classification of Diseases and Related Health Problems 10<sup>th</sup> Revision (ICD-10), including vascular dementia (F01), Dementia in other diseases classified elsewhere (F02), unspecified dementia (F03), Alzheimer's disease (G30), other degenerative diseases of nervous system, not elsewhere classified (G31), other degenerative disorders of nervous system in diseases classified elsewhere (G32), senility (R54), and their subtypes [\[13,23–25,28–54\]](#). Additionally, one article included diagnoses from both International Statistical Classification of Diseases and Related Health Problems 9<sup>th</sup> Revision (ICD-9) involving dementias (code 290), persistent mental disorders due to conditions classified elsewhere (code 294), and other cerebral degenerations (code 331) and the ICD-10 diagnosis F01, F02, F03, G30, and G31 [\[55\]](#).

Six articles reported diagnoses without a specific classification, including Alzheimer's disease and dementia [\[56–61\]](#), senility [\[57,58\]](#), vascular dementia [\[56,60,61\]](#), unspecified dementia [\[56,61\]](#), and Lewy-body dementia [\[61\]](#). Two studies reported Mini-Mental State Examination (MMSE) scores for determining the severity of dementia [\[27,62\]](#). Finally, eight studies reported dementia as a characteristic of the sample without further specification [\[63–70\]](#).

### Study characteristics

Out of the 48 included articles, 44 (91.7%) were published in English, three (6.3%) in German [\[25,34,63\]](#), and one (2%) in Japanese [\[56\]](#). The articles were published between 1997 and 2024. All used a non-experimental design, of which 41

**Table 1. Categorization of PoD.**

| Category                         | PoD included in each category                                                                                                                                                                                                                  |
|----------------------------------|------------------------------------------------------------------------------------------------------------------------------------------------------------------------------------------------------------------------------------------------|
| Home                             | Private address; Home; Residential Care (Homeowner within a fully equipped community); Residential Home (Facility for living under care or supervision).                                                                                       |
| Medical facilities (MF)          | Acute Hospital, Cottage Hospital, District General Hospital, Hospital, Intensive Care Unit, Intermediate Geriatric Care Facility, Long-stay Hospital, Mental Health Facility, Private Clinic, Psychiatric Hospital, Specialized Care Hospital. |
| Long-term care facilities (LTC)  | Care Home, Nursing Home, and Sheltered housing.                                                                                                                                                                                                |
| Palliative care facilities (PCF) | Hospice, Palliative Care Unit (no hospital) <sup>a</sup> .                                                                                                                                                                                     |
| Elsewhere <sup>b</sup>           | Elsewhere, Other, Unknown.                                                                                                                                                                                                                     |

**Note:** <sup>a</sup>'Palliative care unit' is characterized as having a specialized focus on palliative care [\[23–25\]](#); therefore, it was categorized as PCF and not as MF.

<sup>b</sup>The category 'Elsewhere' contains the places of death that studies deemed as not belonging to the previously established categories (e.g., on the street) or as unknown.

<https://doi.org/10.1371/journal.pone.0340024.t001>

(85.4%) reported a retrospective approach with a single data collection time, five (10.4%) reported a time series design, and two (4.2%) reported a cross-sectional design with a prospective approach. For data attainability, 25 (52.1%) studies used death certificates, with one study (2.1%) using obituaries as complementary sources of information [64]. Additionally, six other studies (12.5%) used death registers as data collection tools, and 17 (35.4%) used mortality statistics. Additionally, 26 studies (54.2%) included data from 12 European countries; nine studies (18.8%) included data from East Asia and the Pacific, specifically New Zealand, Japan, and the Republic of Korea; on the other hand, fourteen studies (29.2%) included data from North America, specifically from the United States and Canada; and one study (2.1%) included data from Latin America and the Caribbean, delving on Mexican PwD. Notably, no study included participants from Africa, Central and South Asia, or the Middle East.

### The place of death of people with dementia

Findings show that LTCF are the most frequent PoD in Belgium [13,37,38], Czech Republic [13], England [13,27,37,51,61], Germany [24,25,34,63], Northern Ireland [70], Norway [35,45,65], Scotland [37], Sweden [47], and the Netherlands [13,37,44,46,67].

Conversely, nine studies (18.8%) conducted in the same region reported MF as the most common PoD [25,27,30,31,57,60,62]. Moreover, two multicentric studies (4.2%) found the same trend for Wales/UK [38], France, and Hungary [13]. In addition, a few studies found that Home was the most common PoD in Scotland/UK [23], Portugal [58], Italy, and the Andalusian region in Spain [13]. Finally, two studies (4.2%) found similar proportions for MF and LTCF in Belgium with 47% for each when pneumonia was present as a comorbidity [38] in Finland, with 46.7% for MF and 45.2% for LTCF [48], and Wales where a study set in 2003 found 52.8% of deaths occurred in MF and 43.8% in LTCF [37], while a study including deaths from 2011 to 2013 found a 43.1% of death happened in MF and 48.9% in LTCF [13].

For East Asia and the Pacific, seven studies (14.6%) reported MF as the most common PoD in this region [13,29,36,42,50,52,53,56]. However, two studies (4.2%) reported a higher proportion of deaths in LTCF for PwD in New Zealand [13] and Japan [43].

In North America, MF was reported as the most frequent PoD in Canada and the United States [13,32,33,54,55,59,66,69]. In addition, four studies (8.3%) reported LTCF as the most prevalent [28,39,40,64], while two (4.2%) identified home as the most common PoD [41,68]. Notably, only one (2.1%) study included people from Latin America and the Caribbean in their data [13], reporting home as the most frequent PoD in Mexico. No study reported PCF as the most frequent PoD. [Table 2](#) shows the distribution of PoD proportions in detail.

### Trends

A separate analysis was conducted on the eight studies (16.7%) that reported data on PoD for several years to identify trends. Home deaths have presented a constant decrease in Italy [30], Japan [42,43], Germany [25], and Norway [45] since 1999. Conversely, two studies (4.2%) conducted in the United States have shown an increase in home death frequency since 2000 [54,71], with one study (2.1%) showing a spike in 2021 and 2022 [32].

Similarly, the results show a decreasing trend in MF deaths over the years, with more pronounced trends in Japan, Italy, and Germany and fewer variations in Norway and the United States. The frequency of deaths in LTCF has risen from 1999 to 2020 in the same countries, except the United States, where one study (2.1%) found an increase in death frequency in LTCF, while two studies, report a decreasing number of deaths in LTCF in the same country [54,71]. [Fig 2](#) shows the change in PoD over the years as shown by these studies.

### Associated factors

Nineteen studies (39.6%) reported associations between comorbidities, sociodemographic, and ecological factors and the likelihood of PoD that varied widely in direction and magnitude [13,24,27,28,31,33,37,38,43–45,47,48,51,54,61,62,65,68]. A summary of recurring associations found in these studies is shown in [Fig 3](#).

**Table 2. Frequency of place of death of people with dementia in each country.**

| Study and sample size <sup>c</sup>   | Year of death | Countries      | Context                  | Comorbidities or other reported characteristics <sup>b</sup> | Place of death (%) <sup>a,b</sup> |                    |                           |                            |           |
|--------------------------------------|---------------|----------------|--------------------------|--------------------------------------------------------------|-----------------------------------|--------------------|---------------------------|----------------------------|-----------|
|                                      |               |                |                          |                                                              | Home                              | Medical Facilities | Long-Term Care Facilities | Palliative Care Facilities | Elsewhere |
| <b>Europe (26 studies)</b>           |               |                |                          |                                                              |                                   |                    |                           |                            |           |
| Houttekier et al., 2010<br>n = 30281 | 2003          | Belgium        | Country                  | N/A                                                          | 16.4                              | 22.8               | 60.6                      | 0.1                        | N/A       |
| Houttekier et al., 2013<br>n = 9931  | 2008          | Belgium        | Country                  | Without-pneumonia                                            | 11                                | 28                 | 61                        | N/A                        | N/A       |
| Houttekier et al., 2013<br>n = 9931  | 2008          | Belgium        | Country                  | With-pneumonia                                               | 6                                 | 47                 | 47                        | N/A                        | N/A       |
| Reyniers et al., 2015<br>n = 264604  | 2011-2013     | Belgium        | Country                  | N/A                                                          | 11.2                              | 21.6               | 66.7                      | N/A                        | 0.5       |
| Reyniers et al., 2015<br>n = 264604  | 2011-2013     | Czech Republic | Country                  | N/A                                                          | 10.6                              | 27.5               | 61.5                      | N/A                        | 0.4       |
| Perrels et al., 2014<br>n = 168      | 1985-2007     | England, UK    | City: Cambridge city     | Moderate cognitive impairment                                | 45                                | 55                 | 0                         | N/A                        | N/A       |
| Perrels et al., 2014<br>n = 168      | 1985-2007     | England, UK    | City: Cambridge city     | Severe cognitive impairment                                  | 42                                | 46                 | 13                        | N/A                        | N/A       |
| Fleming et al., 2017<br>n = 147      | 1985-2015     | England, UK    | City: Cambridge city     | Minimal-mild dementia                                        | 15                                | 62                 | 23                        | N/A                        | N/A       |
| Fleming et al., 2017<br>n = 147      | 1985-2015     | England, UK    | City: Cambridge city     | Moderate-severe dementia                                     | 5                                 | 20                 | 76                        | N/A                        | N/A       |
| Sleeman et al., 2014<br>n = 397573   | 2001-2010     | England, UK    | Country                  | N/A                                                          | 4.8                               | 39.58              | 55.33                     | 0.29                       | N/A       |
| Houttekier et al., 2010<br>n = 30281 | 2003          | England, UK    | Country                  | N/A                                                          | 4.9                               | 39.1               | 55.4                      | 0.2                        | N/A       |
| Reyniers et al., 2015<br>n = 264604  | 2011-2013     | England, UK    | Country                  | N/A                                                          | 5                                 | 31.7               | 61.7                      | 0.1                        | 1.5       |
| Wiggins et al., 2019<br>n = 1047     | 2015-2017     | England, UK    | City: London             | N/A                                                          | 26.5                              | 12.1               | 50.9                      | 3.2                        | 7         |
| Masuchi et al., 2017<br>n = 140034   | 1998-2013     | Finland        | Country                  | N/A                                                          | 8.1                               | 46.7               | 45.2                      | N/A                        | N/A       |
| Brosselin et al., 2010<br>n = 45597  | 2000–2006     | France         | Country                  | N/A                                                          | 24.5                              | 43.8               | 29.1                      | N/A                        | 2.6       |
| Reyniers et al., 2015<br>n = 264604  | 2011-2013     | France         | Country                  | N/A                                                          | 27.2                              | 35.9               | 34                        | N/A                        | 2.9       |
| Dasch & Lenz, 2022<br>n = 420        | 2001          | Germany        | Region: Westphalia       | N/A                                                          | 24                                | 40.4               | 35.2                      | 0.4                        | N/A       |
| Dasch et al., 2018<br>n = 1646       | 2011          | Germany        | Region: Westphalia–Lippe | N/A                                                          | 19.87                             | 28.74              | 49.51                     | 1.21                       | 0.67      |
| Dasch & Lenz, 2022<br>n = 420        | 2011          | Germany        | Region: Westphalia       | N/A                                                          | 19.7                              | 29                 | 49.5                      | 1.2                        | N/A       |

(Continued)

Table 2. (Continued)

| Study and sample size <sup>c</sup>        | Year of death | Countries            | Context            | Comorbidities or other reported characteristics <sup>b</sup> | Place of death (%) <sup>a,b</sup> |                    |                           |                            |           |
|-------------------------------------------|---------------|----------------------|--------------------|--------------------------------------------------------------|-----------------------------------|--------------------|---------------------------|----------------------------|-----------|
|                                           |               |                      |                    |                                                              | Home                              | Medical Facilities | Long-Term Care Facilities | Palliative Care Facilities | Elsewhere |
| Dasch & Lenz, 2021<br>n = 485             | 2017          | Germany              | City: Munster      | N/A                                                          | 12                                | 23.1               | 63.7                      | 1.2                        | N/A       |
| Dasch & Lenz, 2022<br>n = 420             | 2017          | Germany              | Region: Westphalia | N/A                                                          | 15.8                              | 24.3               | 57.1                      | 2.7                        | N/A       |
| Dasch, 2023<br>n = 1578                   | 2021          | Germany              | City: Munster      | N/A                                                          | 14.45                             | 25.41              | 58.62                     | 1.52                       | N/A       |
| Reyniers et al., 2015<br>n = 264604       | 2011-2013     | Hungary              | Country            | N/A                                                          | N/A                               | 62.3               | N/A                       | N/A                        | 37.7      |
| Reyniers et al., 2015<br>n = 264604       | 2011-2013     | Italy                | Country            | N/A                                                          | 42.2                              | 32.1               | 19.5                      | N/A                        | 6.2       |
| Basso et al., 2023<br>n = 70301           | 2012-2015     | Italy                | Region: Veneto     | MCOD <sup>e</sup>                                            | 20.7                              | 42.3               | 33.2                      | N/A                        | 3.7       |
| Basso et al., 2023<br>n = 70301           | 2012-2015     | Italy                | Region: Veneto     | UCOD <sup>d</sup>                                            | 20.2                              | 39.6               | 36.9                      | N/A                        | 3.3       |
| Basso et al., 2023<br>n = 70301           | 2016-2019     | Italy                | Region: Veneto     | MCOD                                                         | 19.4                              | 40.6               | 36.2                      | N/A                        | 3.8       |
| Basso et al., 2023<br>n = 70301           | 2016-2019     | Italy                | Region: Veneto     | UCOD                                                         | 19.4                              | 38.3               | 38.6                      | N/A                        | 3.6       |
| Basso et al., 2023<br>n = 70301           | 2020          | Italy                | Region: Veneto     | MCOD                                                         | 19.6                              | 37.1               | 40.5                      | N/A                        | 2.8       |
| Basso et al., 2023<br>n = 70301           | 2020          | Italy                | Region: Veneto     | UCOD                                                         | 21.1                              | 34.2               | 42.3                      | N/A                        | 2.5       |
| Zafeiridi et al., 2021<br>n = 2581        | 2010-2016     | Northern Ireland, UK | Country            | N/A                                                          | N/A                               | N/A                | 64.35                     | 35.65                      | N/A       |
| MacNeil-Vroomen et al., 2020<br>n = 61940 | 2006          | Norway               | Country            | N/A                                                          | 4.4                               | 9                  | 84.9                      | N/A                        | 1.6       |
| MacNeil-Vroomen et al., 2020<br>n = 61940 | 2007          | Norway               | Country            | N/A                                                          | 5.1                               | 8.7                | 85.9                      | N/A                        | 1         |
| MacNeil-Vroomen et al., 2020<br>n = 61940 | 2008          | Norway               | Country            | N/A                                                          | 4.7                               | 9.4                | 84.6                      | N/A                        | 1.2       |
| MacNeil-Vroomen et al., 2020<br>n = 61940 | 2009          | Norway               | Country            | N/A                                                          | 4.4                               | 7.5                | 86.7                      | N/A                        | 1.5       |
| MacNeil-Vroomen et al., 2020<br>n = 61940 | 2010          | Norway               | Country            | N/A                                                          | 4.5                               | 7.9                | 86.8                      | N/A                        | 0.7       |
| MacNeil-Vroomen et al., 2020<br>n = 61940 | 2011          | Norway               | Country            | N/A                                                          | 4.3                               | 6.7                | 87.5                      | N/A                        | 1.5       |

(Continued)

Table 2. (Continued)

| Study and sample size <sup>c</sup>           | Year of death | Countries    | Context                       | Comorbidities or other reported characteristics <sup>b</sup> | Place of death (%) <sup>a,b</sup> |                    |                           |                            |           |
|----------------------------------------------|---------------|--------------|-------------------------------|--------------------------------------------------------------|-----------------------------------|--------------------|---------------------------|----------------------------|-----------|
|                                              |               |              |                               |                                                              | Home                              | Medical Facilities | Long-Term Care Facilities | Palliative Care Facilities | Elsewhere |
| Hagen & Zelko, 2024<br>n = 2900              | 2011-2013     | Norway       | Country                       | N/A                                                          | 15.6                              | N/A                | 84.4                      | N/A                        | N/A       |
| MacNeil-Vroomen et al., 2020<br>n = 61940    | 2012          | Norway       | Country                       | N/A                                                          | 5.1                               | 6.9                | 86.9                      | N/A                        | 1.1       |
| Kjellstadli et al., 2018<br>n = 5447         | 2012-2013     | Norway       | Country                       | N/A                                                          | 5.03                              | 3.87               | 90.9                      | 0.2                        | N/A       |
| MacNeil-Vroomen et al., 2020<br>n = 61940    | 2013          | Norway       | Country                       | N/A                                                          | 4.8                               | 6.7                | 87.1                      | N/A                        | 1.5       |
| MacNeil-Vroomen et al., 2020<br>n = 61940    | 2014          | Norway       | Country                       | N/A                                                          | 5.4                               | 6.8                | 86.6                      | N/A                        | 1.2       |
| MacNeil-Vroomen et al., 2020<br>n = 61940    | 2015          | Norway       | Country                       | N/A                                                          | 4.9                               | 7                  | 87                        | N/A                        | 1.1       |
| MacNeil-Vroomen et al., 2020<br>n = 61940    | 2016          | Norway       | Country                       | N/A                                                          | 2.8                               | 6.9                | 98.1                      | N/A                        | 1.3       |
| MacNeil-Vroomen et al., 2020<br>n = 61940    | 2017          | Norway       | Country                       | N/A                                                          | 2.6                               | 6                  | 90.5                      | N/A                        | 0.9       |
| Gomes et al., 2018<br>n = 40880              | 2010-2016     | Portugal     | Country                       | N/A                                                          | 80.5                              | 19.5               | N/A                       | N/A                        | N/A       |
| Thomas et al., 1997<br>n = 1492              | 1974-1994     | Scotland, UK | Country                       | Vascular dementia                                            | 13.79                             | 86.21              | N/A                       | N/A                        | N/A       |
| Thomas et al., 1997<br>n = 1492              | 1974-1994     | Scotland, UK | Country                       | Alzheimer's disease                                          | 7.79                              | 92.21              | N/A                       | N/A                        | N/A       |
| Black et al., 2016<br>n = 545                | 2000–2010     | Scotland, UK | Region: Dumfries and Galloway | N/A                                                          | 81.2                              | 18.2               | N/A                       | 0.6                        | N/A       |
| Houttekier et al., 2010<br>n = 30281         | 2003          | Scotland, UK | Country                       | N/A                                                          | 7.3                               | 37.6               | 54.9                      | 0.3                        | N/A       |
| Reyniers et al., 2015<br>n = 264604          | 2011-2013     | Spain        | Region: Andalusia             | N/A                                                          | 46.1                              | 33.6               | 20.1                      | N/A                        | 0.2       |
| Cabañero-Martínez et al., 2019<br>n = 117070 | 2012-2015     | Spain        | Country                       | N/A                                                          | 32.2                              | 34.6               | 33.2                      | N/A                        | N/A       |
| Martinsson et al., 2020<br>n = 16462         | 2006-2017     | Sweden       | Country                       | N/A                                                          | N/A                               | 5.9                | 94.1                      | N/A                        | N/A       |

(Continued)

Table 2. (Continued)

| Study and sample size <sup>c</sup>           | Year of death | Countries       | Context     | Comorbidities or other reported characteristics <sup>b</sup> | Place of death (%) <sup>a,b</sup> |                    |                           |                            |           |
|----------------------------------------------|---------------|-----------------|-------------|--------------------------------------------------------------|-----------------------------------|--------------------|---------------------------|----------------------------|-----------|
|                                              |               |                 |             |                                                              | Home                              | Medical Facilities | Long-Term Care Facilities | Palliative Care Facilities | Elsewhere |
| Houttekier et al., 2010<br>n=30281           | 2003          | the Netherlands | Country     | N/A                                                          | 4.7                               | 3                  | 90.7                      | 0.7                        | N/A       |
| MacNeil-Vroomen et al., 2015<br>n=17814      | 2006          | the Netherlands | Country     | N/A                                                          | 3.97                              | 4.24               | 91.79                     | N/A                        | N/A       |
| Reyniers et al., 2015<br>n=264604            | 2011-2013     | the Netherlands | Country     | N/A                                                          | 3.8                               | 1.6                | 93.1                      | N/A                        | 1.5       |
| MacNeil-Vroomen et al., 2021<br>n=81373      | 2012-2017     | the Netherlands | Country     | N/A                                                          | 5.82                              | 1.98               | 90.23                     | N/A                        | 1.97      |
| Oosterveld-Vlug et al., 2022<br>n=17148      | 2017          | the Netherlands | Country     | N/A                                                          | 10.2                              | 1.8                | 85.6                      | N/A                        | 2.5       |
| Houttekier et al., 2010<br>n=30281           | 2003          | Wales, UK       | Country     | N/A                                                          | 3.3                               | 52.8               | 43.8                      | N/A                        | N/A       |
| Reyniers et al., 2015<br>n=264604            | 2011-2013     | Wales, UK       | Country     | N/A                                                          | 4.2                               | 43.1               | 48.9                      | 0.1                        | 3.7       |
| <b>East Asia and the Pacific (9 studies)</b> |               |                 |             |                                                              |                                   |                    |                           |                            |           |
| Bessho et al., 2005<br>n=170                 | 1992-2002     | Japan           | City: Kyoto | N/A                                                          | 18.8                              | 48.3               | 32.4                      | N/A                        | 0.6       |
| Nakanishi et al., 2018<br>n=960423           | 1996-2016     | Japan           | Country     | N/A                                                          | 25                                | 52                 | 23                        | N/A                        | N/A       |
| Koyama et al., 2019<br>n=182077              | 1999          | Japan           | Country     | N/A                                                          | 27.4                              | 54.8               | 15.8                      | N/A                        | 0.56      |
| Koyama et al., 2019<br>n=182077              | 2000          | Japan           | Country     | N/A                                                          | 23.3                              | 53.1               | 18.7                      | N/A                        | 0.77      |
| Koyama et al., 2019<br>n=182077              | 2001          | Japan           | Country     | N/A                                                          | 21.5                              | 55.5               | 20.6                      | N/A                        | 0.64      |
| Koyama et al., 2019<br>n=182077              | 2002          | Japan           | Country     | N/A                                                          | 20.2                              | 56                 | 21.8                      | N/A                        | 0.73      |
| Koyama et al., 2019<br>n=182077              | 2003          | Japan           | Country     | N/A                                                          | 17.6                              | 57.7               | 21.1                      | N/A                        | 0.99      |
| Koyama et al., 2019<br>n=182077              | 2004          | Japan           | Country     | N/A                                                          | 15.8                              | 58.9               | 22.2                      | N/A                        | 1.39      |
| Koyama et al., 2019<br>n=182077              | 2005          | Japan           | Country     | N/A                                                          | 15.8                              | 58.2               | 24.7                      | N/A                        | 1.26      |
| Koyama et al., 2019<br>n=182077              | 2006          | Japan           | Country     | N/A                                                          | 15.8                              | 58.4               | 24.2                      | N/A                        | 11.6      |
| Koyama et al., 2022<br>n=5572                | 2006          | Japan           | Country     | N/A                                                          | 12.2                              | 43.6               | 43.6                      | N/A                        | 0.6       |

(Continued)

Table 2. (Continued)

| Study and sample size <sup>c</sup> | Year of death | Countries | Context | Comorbidities or other reported characteristics <sup>b</sup> | Place of death (%) <sup>a,b</sup> |                    |                           |                            |           |
|------------------------------------|---------------|-----------|---------|--------------------------------------------------------------|-----------------------------------|--------------------|---------------------------|----------------------------|-----------|
|                                    |               |           |         |                                                              | Home                              | Medical Facilities | Long-Term Care Facilities | Palliative Care Facilities | Elsewhere |
| Koyama et al., 2019<br>n = 182077  | 2007          | Japan     | Country | N/A                                                          | 14.3                              | 57.1               | 26.9                      | N/A                        | 1.71      |
| Koyama et al., 2022<br>n = 5572    | 2007          | Japan     | Country | N/A                                                          | 15.5                              | 42.9               | 40.2                      | N/A                        | 1.4       |
| Koyama et al., 2019<br>n = 182077  | 2008          | Japan     | Country | N/A                                                          | 14.6                              | 54.9               | 28.3                      | N/A                        | 2.24      |
| Koyama et al., 2022<br>n = 5572    | 2008          | Japan     | Country | N/A                                                          | 13.5                              | 35.9               | 47.1                      | N/A                        | 3.5       |
| Koyama et al., 2019<br>n = 182077  | 2009          | Japan     | Country | N/A                                                          | 13                                | 54.5               | 29.9                      | N/A                        | 2.58      |
| Wammes et al., 2021<br>n = 149638  | 2009          | Japan     | Country | N/A                                                          | 12.8                              | 57.5               | 19.9                      | N/A                        | 9.73      |
| Koyama et al., 2022<br>n = 5572    | 2009          | Japan     | Country | N/A                                                          | 9.5                               | 35.6               | 53.5                      | N/A                        | 1.5       |
| Wammes et al., 2022<br>n = 216442  | 2009-2016     | Japan     | Country | Pre-reform                                                   | 23.1                              | 58.2               | 13                        | N/A                        | 5.6       |
| Wammes et al., 2022<br>n = 216442  | 2009-2016     | Japan     | Country | Post-reform                                                  | 11.6                              | 52.5               | 24.3                      | N/A                        | 11.7      |
| Koyama et al., 2019<br>n = 182077  | 2010          | Japan     | Country | N/A                                                          | 12.2                              | 51.6               | 32.8                      | N/A                        | 3.36      |
| Wammes et al., 2021<br>n = 149638  | 2010          | Japan     | Country | N/A                                                          | 12.1                              | 54.9               | 21.3                      | N/A                        | 11.8      |
| Koyama et al., 2022<br>n = 5572    | 2010          | Japan     | Country | N/A                                                          | 11.7                              | 37.3               | 47.9                      | N/A                        | 3.1       |
| Koyama et al., 2019<br>n = 182077  | 2011          | Japan     | Country | N/A                                                          | 11.5                              | 50.7               | 34.3                      | N/A                        | 3.5       |
| Wammes et al., 2021<br>n = 149638  | 2011          | Japan     | Country | N/A                                                          | 11.4                              | 54.1               | 22.8                      | N/A                        | 11.8      |
| Koyama et al., 2022<br>n = 5572    | 2011          | Japan     | Country | N/A                                                          | 10.3                              | 32.9               | 54.7                      | N/A                        | 2.1       |
| Koyama et al., 2019<br>n = 182077  | 2012          | Japan     | Country | N/A                                                          | 11.8                              | 49                 | 35.8                      | N/A                        | 3.47      |
| Wammes et al., 2021<br>n = 149638  | 2012          | Japan     | Country | N/A                                                          | 11.7                              | 52.1               | 23.8                      | N/A                        | 12.5      |
| Koyama et al., 2022<br>n = 5572    | 2012          | Japan     | Country | N/A                                                          | 10                                | 34.1               | 53                        | N/A                        | 3         |

(Continued)

Table 2. (Continued)

| Study and sample size <sup>c</sup>   | Year of death | Countries            | Context                                   | Comorbidities or other reported characteristics <sup>b</sup> | Place of death (%) <sup>a,b</sup> |                    |                           |                            |           |
|--------------------------------------|---------------|----------------------|-------------------------------------------|--------------------------------------------------------------|-----------------------------------|--------------------|---------------------------|----------------------------|-----------|
|                                      |               |                      |                                           |                                                              | Home                              | Medical Facilities | Long-Term Care Facilities | Palliative Care Facilities | Elsewhere |
| Koyama et al., 2019<br>n = 182077    | 2013          | Japan                | Country                                   | N/A                                                          | 11.5                              | 48.3               | 36.7                      | N/A                        | 3.48      |
| Wammes et al., 2021<br>n = 149638    | 2013          | Japan                | Country                                   | N/A                                                          | 11.5                              | 51.5               | 25.3                      | N/A                        | 11.7      |
| Koyama et al., 2022<br>n = 5572      | 2013          | Japan                | Country                                   | N/A                                                          | 9.6                               | 30.6               | 56.7                      | N/A                        | 3.1       |
| Koyama et al., 2019<br>n = 182077    | 2014          | Japan                | Country                                   | N/A                                                          | 10.9                              | 47.4               | 37.7                      | N/A                        | 3.92      |
| Wammes et al., 2021<br>n = 149638    | 2014          | Japan                | Country                                   | N/A                                                          | 10.9                              | 50.4               | 26.3                      | N/A                        | 12.4      |
| Koyama et al., 2022<br>n = 5572      | 2014          | Japan                | Country                                   | N/A                                                          | 9.8                               | 31.4               | 54.9                      | N/A                        | 3.9       |
| Koyama et al., 2019<br>n = 182077    | 2015          | Japan                | Country                                   | N/A                                                          | 10.6                              | 46.4               | 39                        | N/A                        | 4.03      |
| Wammes et al., 2021<br>n = 149638    | 2015          | Japan                | Country                                   | N/A                                                          | 10.5                              | 49.5               | 27.1                      | N/A                        | 12.8      |
| Koyama et al., 2022<br>n = 5572      | 2015          | Japan                | Country                                   | N/A                                                          | 9.3                               | 29.2               | 57.9                      | N/A                        | 3.6       |
| Koyama et al., 2019<br>n = 182077    | 2016          | Japan                | Country                                   | N/A                                                          | 10.5                              | 45                 | 40.6                      | N/A                        | 3.92      |
| Wammes et al., 2021<br>n = 149638    | 2016          | Japan                | Country                                   | N/A                                                          | 10.6                              | 48.1               | 28.8                      | N/A                        | 12.5      |
| Koyama et al., 2022<br>n = 5572      | 2016          | Japan                | Country                                   | N/A                                                          | 9.4                               | 27.5               | 59.2                      | N/A                        | 3.9       |
| Nakanishi et al., 2023<br>n = 653959 | 2018-2021     | Japan                | Country                                   | N/A                                                          | 8.6                               | 63.6               | 25.9                      | N/A                        | 1.9       |
| Harada et al., 2024<br>n = 279703    | 2019–2023     | Japan                | Country                                   | N/A                                                          | 9.9                               | 48.7               | 38.9                      | N/A                        | N/A       |
| Reyniers et al., 2015<br>n = 264604  | 2011-2013     | New Zealand          | Country                                   | N/A                                                          | 4.5                               | 14.3               | 76.6                      | 0.3                        | 4.4       |
| Reyniers et al., 2015<br>n = 264604  | 2007          | the epublico f Korea | Country                                   | N/A                                                          | 20.5                              | 73.6               | 5.5                       | N/A                        | 0.4       |
| <b>North America (15 studies)</b>    |               |                      |                                           |                                                              |                                   |                    |                           |                            |           |
| Jayaraman & Joseph, 2013<br>n = 8683 | 2004-2008     | Canada               | Providence/<br>State:<br>British Columbia | N/A                                                          | 2.6                               | 22                 | 75.2                      | N/A                        | 0.1       |
| Quinn et al., 2021<br>n = 14033      | 2010-2017     | Canada               | Providence/<br>State: Ontario             | N/A                                                          | 75                                | 14.1               | N/A                       | N/A                        | 11        |

(Continued)

Table 2. (Continued)

| Study and sample size <sup>c</sup>   | Year of death | Countries     | Context                                       | Comorbidities or other reported characteristics <sup>b</sup> | Place of death (%) <sup>a,b</sup> |                    |                           |                            |           |
|--------------------------------------|---------------|---------------|-----------------------------------------------|--------------------------------------------------------------|-----------------------------------|--------------------|---------------------------|----------------------------|-----------|
|                                      |               |               |                                               |                                                              | Home                              | Medical Facilities | Long-Term Care Facilities | Palliative Care Facilities | Elsewhere |
| Reyniers et al., 2015<br>n = 264604  | 2011-2013     | Canada        | Country                                       | N/A                                                          | 3.4                               | 32.3               | 59.4                      | N/A                        | 4.9       |
| Ganguli & Rodriguez, 1999<br>n = 172 | 1987-1996     | United States | Providence/State: Washington and Pennsylvania | N/A                                                          | 12.2                              | 54.6               | 23.3                      | N/A                        | 9.9       |
| Lane et al., 1998<br>n = 3109        | 1988-1994     | United States | Providence/State: South Carolina              | N/A                                                          | 12                                | 34                 | 44                        | <1                         | N/A       |
| Khan et al., 204<br>n = 1852432      | 1999-2020     | United States | Country                                       | N/A                                                          | 22.4                              | 8.3                | 57.3                      | 4.1                        | 7.8       |
| Teno et al., 2013<br>n = 126926      | 2000          | United States | Country                                       | N/A                                                          | 19.9                              | 28.6               | 45.6                      | N/A                        | N/A       |
| Xu et al., 2020<br>n = 298453        | 2000          | United States | Country                                       | N/A                                                          | 12.4                              | 15.6               | 67.9                      | N/A                        | 4.1       |
| Mitchell et al., 2005<br>n = 88523   | 2001          | United States | Country                                       | N/A                                                          | 12.8                              | 15.6               | 66.9                      | N/A                        | 4.7       |
| Cross et al., 2020<br>n = 2778592    | 2003-2017     | United States | Country                                       | N/A                                                          | 18.4                              | 10.1               | 58.4                      | 4.5                        | 8.6       |
| Lo et al., 2023<br>n = 3291422       | 2004-2021     | United States | Country                                       | Ethnicity: White                                             | 19.64                             | 9.56               | 58.12                     | 4.84                       | 7.84      |
| Lo et al., 2023<br>n = 3291422       | 2004-2021     | United States | Country                                       | Ethnicity: Japanese                                          | 25.91                             | 13.26              | 41.8                      | 2.77                       | 16.26     |
| Lo et al., 2023<br>n = 3291422       | 2004-2021     | United States | Country                                       | Ethnicity: Korean                                            | 23.78                             | 17.05              | 47.36                     | 3.63                       | 8.18      |
| Lo et al., 2023<br>n = 3291422       | 2004-2021     | United States | Country                                       | Ethnicity: Asian Indian                                      | 43.12                             | 18.25              | 28.69                     | 4.88                       | 5.06      |
| Lo et al., 2023<br>n = 3291422       | 2004-2021     | United States | Country                                       | Ethnicity: Filipino                                          | 36.82                             | 19.61              | 32.68                     | 2.88                       | 8.01      |
| Lo et al., 2023<br>n = 3291422       | 2004-2021     | United States | Country                                       | Ethnicity: Chinese                                           | 25.95                             | 22.42              | 40.82                     | 3.56                       | 7.25      |
| Lo et al., 2023<br>n = 3291422       | 2004-2021     | United States | Country                                       | Ethnicity: Vietnamese                                        | 35.87                             | 23.15              | 34.74                     | 2.93                       | 3.31      |
| Reyniers et al., 2015<br>n = 264604  | 2007          | United States | Country                                       | N/A                                                          | 15.3                              | 13.2               | 62.6                      | 2.9                        | 6         |
| Teno et al., 2013<br>n = 126926      | 2009          | United States | Country                                       | N/A                                                          | 22.8                              | 17.5               | 48.8                      | N/A                        | N/A       |
| Kim et al., 2024<br>n = 893086       | 2010-2019     | United States | Country                                       | N/A                                                          | 77.8                              | 42.6               | NA                        | 41.3                       | N/A       |
| Xu et al., 2020<br>n = 298453        | 2014          | United States | Country                                       | N/A                                                          | 21                                | 9.7                | 55.6                      | N/A                        | 13.7      |
| Nguyen et al., 2022<br>n = 1148      | 2015-2020     | United States | Country                                       | HBPC <sup>f</sup>                                            | 56                                | 12                 | 6                         | 0                          | 26        |

(Continued)

Table 2. (Continued)

| Study and sample size <sup>c</sup>                 | Year of death                                | Countries     | Context | Comorbidities or other reported characteristics <sup>b</sup> | Place of death (%) <sup>a,b</sup> |                    |                           |                            |           |
|----------------------------------------------------|----------------------------------------------|---------------|---------|--------------------------------------------------------------|-----------------------------------|--------------------|---------------------------|----------------------------|-----------|
|                                                    |                                              |               |         |                                                              | Home                              | Medical Facilities | Long-Term Care Facilities | Palliative Care Facilities | Elsewhere |
| Nguyen et al., 2022<br>n = 1148                    | 2015-2020                                    | United States | Country | Non-HBPC <sup>g</sup>                                        | 31                                | 20                 | 16                        | 1                          | 31        |
| Gotanda et al., 2022<br>n = 400002                 | 2016-2018                                    | United States | Country | N/A                                                          | 34.6                              | 16.5               | 39.6                      | 9.6                        | N/A       |
| Chen et al., 2023<br>n = 509179                    | Pandemic year 1 (March 2020 – February 2021) | United States | Country | N/A                                                          | 28.66                             | 13.79              | 50.92                     | 6.63                       | N/A       |
| Chen et al., 2023<br>n = 509179                    | Pandemic year 2 (March 2021 – February 2022) | United States | Country | N/A                                                          | 33.34                             | 13.6               | 45.19                     | 7.87                       | N/A       |
| <b>Latin America and the Caribbean (one study)</b> |                                              |               |         |                                                              |                                   |                    |                           |                            |           |
| Reyniers et al., 2015<br>n = 264604                | 2011-2013                                    | Mexico        | Country | N/A                                                          | 69.3                              | 26.2               | N/A                       | N/A                        | 4.5       |

**Note:** Data from 48 studies are presented disaggregated by countries

<sup>a</sup>PoD prevalence is presented using a heat map (green = lower proportion; red = higher proportion).

<sup>b</sup>N/A was used for lack of data regarding PoD frequency or associated factors.

<sup>c</sup>Includes only PwD.

<sup>d</sup>Underlying cause of death (UCOD).

<sup>e</sup>Multiple causes of death (MCOd).

<sup>f</sup>Homebased primary care (HBPC).

<sup>g</sup>Non-Homebased primary care (HBPC).

<https://doi.org/10.1371/journal.pone.0340024.t002>

### Evidence-based suggestion for end-of-life care

Suggestions and recommendations for medical staff, policymakers, facilities' adaptations, and death planning were retrieved from nine studies [13,24,25,49,58,62,66–68].

Recommendations for the organization of end-of-life care provision included: Enhancing the availability of proper outpatient palliative care for PwD [51,58], increasing investments in care homes [61], promoting access to appropriate end-of-life care [13], and developing integrative services to address care needs across different stages of the disease trajectory [32]. Additionally, the authors suggested that healthcare workers should be able to offer palliative care across all healthcare settings [24,38,49,62,66–68], provide needs-based patient care [24,28,34], and promote proper end-of-life planning [51,58,61].

One single article explored the preferred PoD of PwD [61], reporting that 672 (83.7%) participants included in the study achieved their preferred PoD, and 16.3% stated their preferred PoD but did not achieve it. No other research delved into the preferred PoD.

### Discussion

This scoping review reveals significant variability in the PoD of PwD across different regions and settings. This variability highlights the influence of multiple sociodemographic and contextual factors on end-of-life care and outcomes for PwD that should be further studied.

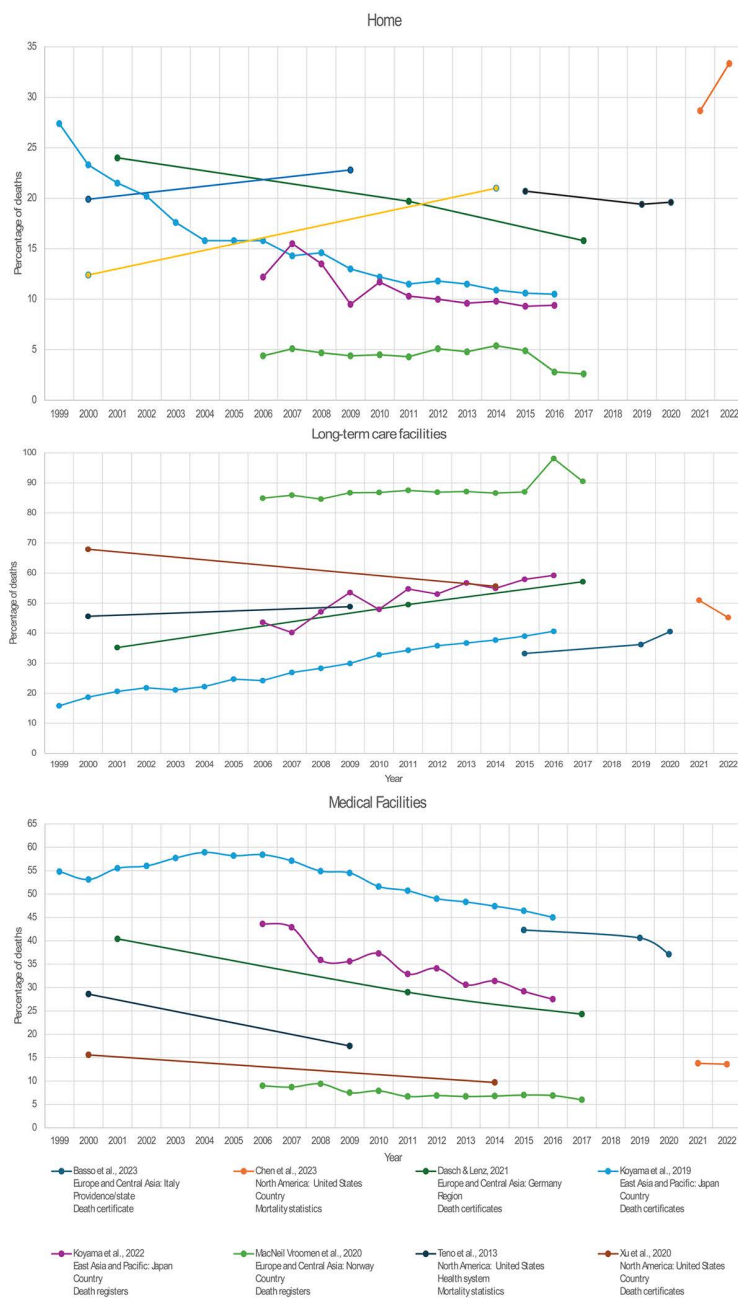

**Fig 2. Trends in place of death of people with dementia at home, long-term care facilities, and medical facilities.**

<https://doi.org/10.1371/journal.pone.0340024.g002>

### Main findings

Reporting the most common PoD of PwD is not possible due to the high variability of the data. In most studies, LTCF were the most frequently reported PoD; however, this trend may be attributed to a representation bias, as most studies (26 out of 48) were conducted with a sample from Europe. Conversely, in East Asia and the Pacific, as well as in North America, MF were found to be the most frequent PoD of PwD. Previous studies suggest that this could be a consequence of social

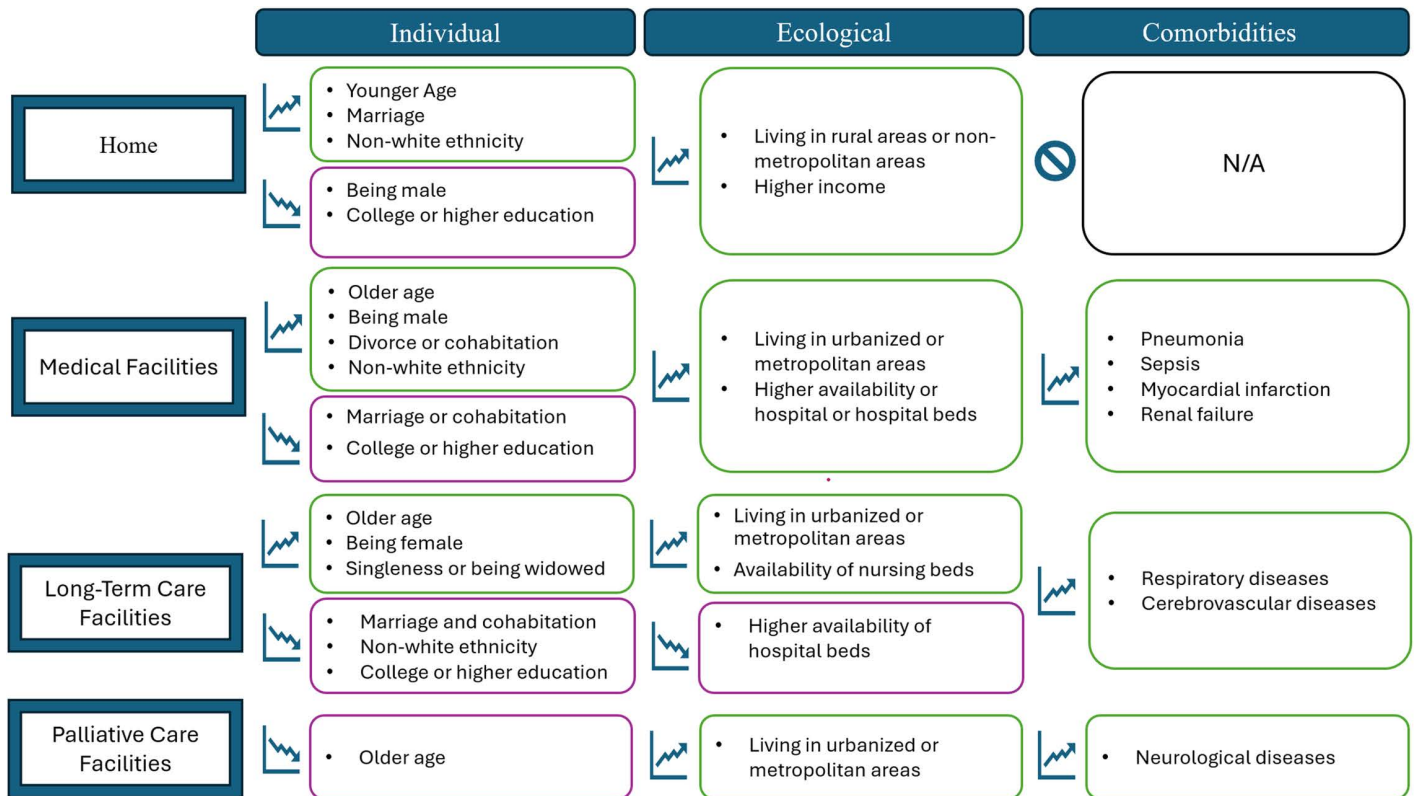

**Fig 3. Comorbidities, sociodemographic, and ecological factors associated with the place of death of people with dementia.** Note: Green-lined boxes contain factors that contribute to increased likelihood, and purple-lined boxes contain factors that contribute to decreased likelihood of dying at a specific PoD.

<https://doi.org/10.1371/journal.pone.0340024.g003>

inequality. Countries in North America and East Asia and the Pacific have similar healthcare expenditures to Europe [72]; nevertheless, European citizens face lower inequality levels, greater access to affordable healthcare [73,74], better health-related infrastructure, higher availability of professionals, and better organization and governance [75].

Home was deemed the most frequent PoD in Mexico, which could be explained by the literature's remarks on higher rates of home deaths in low and middle-income countries (LMIC) [76]. Home was also found to be the most prevalent in the Dumfries and Galloway region in Scotland [60], as well as Italy, and the Andalucia region in Spain [13], which could be a specific phenomenon or cultural factor in the studied region or population, as other results from the same countries [30,37,57,60] do not support these findings. Moreover, the frequency of reported deaths in PCF was minimal across all regions. However, there may be an underestimation of death at PCF, as they may be registered under other labels. Additionally, while the category 'Elsewhere' was reported on very few occasions, over one-third of PwD in Hungary die in these locations [13], and its reasons should be further studied.

Most studies were conducted in high-income countries, and only one study presented data from the Latin America and Caribbean region [13]. No study included a population from South Asia, Sub-Saharan Africa, or the Middle East and North Africa. Therefore, results reflect only a partial view of the situation worldwide for PwD, lacking a comprehensive perspective of LMIC, where healthcare systems are usually weaker and where palliative care is in initial phases of development or there are fewer programs for PwD [77,78]. This result is of particular importance, given the rising cases of dementia in these regions and the prevalence of risk factors that health systems have not addressed [2,5].

## Trends

Eight studies (16.7%) provided data from several years, enabling analysis of trends over time [25,30,32,42,43,45,54,69]. Findings showed an overall increase in deaths occurring in LTCF. This may be associated with a parallel rise in LTCF infrastructure development [79,80]. Additionally, studies have found an increased risk of death in LTCF for older individuals and for PwD [81,82].

Home deaths appear to have decreased over time in Italy, Japan, Norway, and Germany, possibly reflecting changes in societal composition (e.g., fewer family members) and the substantial burden families face when managing the demands of PwD [83–85]. Conversely, the home deaths increase in the US, contrary to trends in other regions, is consistent with studies showing that older adults are more likely to die at home than in other PoD in this country [86]. This trend may be attributed to the higher rates of family caregiving [87], healthcare access [73,75], and infrastructure saturation during the pandemic, where most deaths due to COVID-19 occurred in MF, while home deaths increased for all conditions, including dementia [75,88].

## Sociodemographic factors

Overall, our findings reveal that younger PwD are more likely to die at home, whereas older individuals tend to die in institutional settings such as LTCF. Previous studies on PwD support this trend [13,57,81,89]. Contributing factors include the availability of family caregiving [81,87], and the preference for Home as the PoD among older individuals [61,90].

The relationship between education level and PoD was contradictory. Some studies suggested that a higher educational level is linked to a decreased likelihood of dying at home [33,54], while other results indicated a connection between a higher educational level and MF and LTCF death [13]. These mixed findings have also been evidenced in a systematic review with a focus on a worldwide sampling, which found that the relationship between PoD and educational level is inconclusive [91].

Social support and cohabitation are also associated with PoD outcomes. Being married is associated with a higher likelihood of dying at home, whereas being single, widowed, or living in cohabitation is associated with institutional death [33,92]. This finding can be explained by the role of family support in end-of-life care, which decreases the need for external institutions like MF and LTCF [87,91,93,94].

## Contextual/ healthcare factors

Our findings on resource availability and living area suggest that access to available beds, and professionals could influence PoD prevalence. A higher availability of hospital beds increases the likelihood of dying at MF [54], while decreasing the odds of dying at LTCF [92]. Conversely, some findings suggest that a higher availability of nursing home beds increases the chance of dying at LTCF [37,54]. Similar findings have been evidenced, as availability in a specific setting increased the odds of dying at that site, while decreasing the probability of dying at other places [38,93,95–98]. For instance, political decisions to strengthen long-term care facilities clearly increased the likelihood of institutional deaths in the Netherlands [45] and Japan [29,42,50,53].

Additionally, PwD living in urbanized or metropolitan areas are prone to die in MF, LTCF, and PCF. In contrast, those living in rural areas or non-metropolitan areas are more likely to die at home. This variation may be caused by increased access to healthcare and health professionals in urbanized areas, leading to more frequent consultation and, therefore, entry into care institutions [91,93,94].

A higher income was linked with home death, possibly due to better access to outpatient and home-based care [87,90,91,94]. Conversely, lower socioeconomic status has been associated with institutional deaths [91,99,100]. Literature indicates that in low-income countries, access to healthcare and palliative care facilities is limited, as available resources are primarily allocated to medical provision [76,101]. The relationship between income, socioeconomic status, and allocation of resources must be further studied.

## Limitations

This scoping review only included studies with administrative data. Research considering other sources (e.g., caregiver interviews) may provide additional insight into where PwD die, how they do so, and under which conditions. Similarly, administrative data might reflect different variables in each country, and it is known that using death certificates could present inaccurate information [102]. The lack of other types of information limits the exploration of different social and cultural aspects that might be at play regarding PoD.

Furthermore, the lack of quality appraisal in the present scoping review may present as a limitation, as information derived from that process may help to better interpret the charted data. Additionally, the present study excluded gray literature. This could leave out relevant manuscripts from the review that could offer a different perspective on the studied subject or introduce publication bias. Given that dementia tends to be underreported, there may be more PwD who are not considered in the included studies. Moreover, the severity of dementia was not considered in each study, and it may affect the type of care required for PwD approaching the end of life, as well as the PoD [103]. Furthermore, results should be interpreted considering the representation bias, as over 50% of the included studies reported data from Europe, leaving other regions underrepresented.

The wide disparities among the studied factors and PoD sites reported made data synthesis challenging. Although the categories created might partially address PoD differences, specificities from the context of each country or region might not be reflected. For example, LTCFs were more common in Europe but less so in East Asia and the Pacific. Additionally, only a few studies report PCFs as PoD, which could be due to the lack of this type of facility in the country or region, or the lack of PwD dying in them. Additionally, none of the studies included data from participants from Africa, Central and South Asia, or the Middle East. Hence, with this review, we could not delve into specific details of place of care, preferred PoD, or quality of end-of-life care, as well as other factors influencing PoD.

## Implications for future research, policy, and care

This review highlights several gaps in existing literature that future research needs to address. First, studies in LMIC are necessary to provide a more comprehensive overview of the situation of PwD. However, creative approaches that account for common structural challenges are needed. For example, researchers could focus on community-based practices and use qualitative methods to understand where and how PwD live and die, especially in rural or underserved areas. Additionally, research is required on the preferred PoD of PwD and the needs of patients and families, especially in end-of-life care. Achieving the preferred PoD has been identified as essential for improving quality-of-life in terminal care, where actions such as direct inquiry, the reallocation of resources, health care professionals' training, and the involvement of family can allow people to achieve their preference for PoD [11,104].

Future studies should focus on how the burden of disease affects the quality of life of PwD, and how the site of residence before death relates to PoD. Additionally, research should consider the perspectives of PwD and their families to ensure that care models align with their values and wishes. Moreover, given that only a fraction of the studies looked at variations over the years, future research should further explore changes over time for each region, as contextual factors may vary. Furthermore, as most PoD studies rely on the validity of the data sources retrieved, research is needed on how these sources influence the reliability of studies (e.g., death certificates vs. mortality statistics).

Regarding policy implications, governments and policymakers should prepare for the increasing number of PwD expected in the coming years [2,3] and be ready to evaluate the tailored policies created to respond to the population of each country. For example, given that death at PCF is not common, the integration of palliative care in LTCF, hospitals, and the community into the continuum of dementia care could be widely beneficial [77]; thus, a greater investment in community-based palliative care services is needed to enable more PwD to die at home if they wish to do so.

Additionally, the results of this review suggest that an increase in the availability of beds and the quality of end-of-life care in LTCFs could benefit PwD and their caregivers, as well as that resource accessibility may influence PoD

prevalence. Policymakers should consider these relationships to reduce disparities in access to and quality of end-of-life care by ensuring appropriate support and end-of-life care for PwD and their caregivers, regardless of their sociodemographic background.

Last, direct implications for care include planning for a preferred PoD as death approaches [43,61,65] and initiating palliative care promptly to improve end-of-life quality [101]. Moreover, promoting home death and outpatient care should be reinforced as with adequate support, home care can offer better end-of-life quality for the decedent and their family, without facing the possible challenges of care in other settings [51,58,61,89,90].

## Conclusions

Our scoping review reveals that research around dementia and PoD is limited to a few countries/geographical locations, although dementia prevalence is rising. PoD of PwD shows great variations by country, year, and region. These results show the need for social and health policies that ensure access to quality end-of-life care, especially in the most common PoD in each country. Considering the included studies, in Europe, where most data come from, LTCF are the most frequent PoD of PwD, followed by MF. In East Asia and the Pacific, as well as in North America, MF were more common. There is insufficient information for other regions of the world. Some studies also report that the PoD of PwD is influenced by age, gender, marital status, ethnicity, education level, living in urban or rural areas, income level, hospital and nursing home bed availability, and comorbidities. This detailed analysis of the PoD of PwD enables the identification of patterns that may reflect not only individual and cultural preferences but also structural factors such as availability, accessibility, and quality of end-of-life care in each country. These results highlight the need for further research to better understand the conditions surrounding PoD and the place of care of PwD.

## Supporting information

### S1 File. Preferred Reporting Items for Systematic reviews and Meta-Analyses extension for Scoping Reviews (PRISMA-ScR) Checklist.

(DOCX)

## Acknowledgments

We appreciate the feedback received during the writing process of this manuscript from the members of the Bienestar, Salud y Sociedad Research Group.

## Author contributions

**Conceptualization:** Paula Hidalgo-Andrade, Alejandro Unda-López, Tania Pastrana.

**Data curation:** Paula Hidalgo-Andrade, Alejandro Unda-López, Tania Pastrana.

**Formal analysis:** Paula Hidalgo-Andrade, Alejandro Unda-López.

**Funding acquisition:** Paula Hidalgo-Andrade.

**Investigation:** Paula Hidalgo-Andrade, Alejandro Unda-López, Tania Pastrana.

**Methodology:** Paula Hidalgo-Andrade, Alejandro Unda-López, Tania Pastrana.

**Project administration:** Paula Hidalgo-Andrade, Alejandro Unda-López, Tania Pastrana.

**Resources:** Paula Hidalgo-Andrade, Alejandro Unda-López, Tania Pastrana.

**Software:** Alejandro Unda-López.

**Supervision:** Paula Hidalgo-Andrade, Alejandro Unda-López, Tania Pastrana.

**Validation:** Tania Pastrana.

**Visualization:** Alejandro Unda-López.

**Writing – original draft:** Paula Hidalgo-Andrade, Alejandro Unda-López, Tania Pastrana.

**Writing – review & editing:** Paula Hidalgo-Andrade, Alejandro Unda-López, Tania Pastrana.

## References

1. World Health Organization. Dementia. <https://www.who.int/news-room/fact-sheets/detail/dementia>. 2023. Accessed 2023 October 1.
2. Livingston G, Huntley J, Sommerlad A, Ames D, Ballard C, Banerjee S, et al. Dementia prevention, intervention, and care: 2020 report of the lancet commission. *Lancet*. 2020;396(10248):413–46. [https://doi.org/10.1016/S0140-6736\(20\)30367-6](https://doi.org/10.1016/S0140-6736(20)30367-6) PMID: [32738937](https://pubmed.ncbi.nlm.nih.gov/32738937/)
3. World Health Organization. Global status report on the public health response to dementia. Geneva: World Health Organization. 2021. <https://www.who.int/publications/i/item/9789240033245>
4. Knaul FM, Farmer PE, Krakauer EL, De Lima L, Bhadelia A, Jiang Kwete X, et al. Alleviating the access abyss in palliative care and pain relief—an imperative of universal health coverage: the Lancet Commission report. *Lancet*. 2018;391(10128):1391–454. [https://doi.org/10.1016/S0140-6736\(17\)32513-8](https://doi.org/10.1016/S0140-6736(17)32513-8) PMID: [29032993](https://pubmed.ncbi.nlm.nih.gov/29032993/)
5. Sleeman KE, de Brito M, Etkind S, Nkhoma K, Guo P, Higginson IJ, et al. The escalating global burden of serious health-related suffering: projections to 2060 by world regions, age groups, and health conditions. *Lancet Glob Health*. 2019;7(7):e883–92. [https://doi.org/10.1016/S2214-109X\(19\)30172-X](https://doi.org/10.1016/S2214-109X(19)30172-X) PMID: [31129125](https://pubmed.ncbi.nlm.nih.gov/31129125/)
6. Kelley AS, McGarry K, Gorges R, Skinner JS. The burden of health care costs for patients with dementia in the last 5 years of life. *Ann Intern Med*. 2015;163(10):729–36. <https://doi.org/10.7326/M15-0381> PMID: [26502320](https://pubmed.ncbi.nlm.nih.gov/26502320/)
7. 2024 Alzheimer's disease facts and figures. *Alzheimers Dement*. 2024;20(5):3708–821. <https://doi.org/10.1002/alz.13809> PMID: [38689398](https://pubmed.ncbi.nlm.nih.gov/38689398/)
8. Bunn F, Burn A-M, Goodman C, Rait G, Norton S, Robinson L, et al. Comorbidity and dementia: a scoping review of the literature. *BMC Med*. 2014;12:192. <https://doi.org/10.1186/s12916-014-0192-4> PMID: [25358236](https://pubmed.ncbi.nlm.nih.gov/25358236/)
9. Alzheimer's Disease International. World Alzheimer Report 2021. 2021. <https://www.alzint.org/u/World-Alzheimer-Report-2021.pdf>
10. Paddy M. Influence of location on a good death. *Nurs Stand*. 2011;26(1):33–6. <https://doi.org/10.7748/ns2011.09.26.1.33.c8693> PMID: [21977742](https://pubmed.ncbi.nlm.nih.gov/21977742/)
11. Ali M, Capel M, Jones G, Gazi T. The importance of identifying preferred place of death. *BMJ Support Palliat Care*. 2019;9(1):84–91. <https://doi.org/10.1136/bmjspcare-2015-000878> PMID: [26408428](https://pubmed.ncbi.nlm.nih.gov/26408428/)
12. Finkelstein EA, Bhadelia A, Goh C, Baid D, Singh R, Bhatnagar S, et al. Cross Country Comparison of Expert Assessments of the Quality of Death and Dying 2021. *J Pain Symptom Manage*. 2022;63(4):e419–29. <https://doi.org/10.1016/j.jpainsymman.2021.12.015> PMID: [34952169](https://pubmed.ncbi.nlm.nih.gov/34952169/)
13. Reyniers T, Deliens L, Pasman HR, Morin L, Addington-Hall J, Frova L, et al. International variation in place of death of older people who died from dementia in 14 European and non-European countries. *J Am Med Dir Assoc*. 2015;16(2):165–71. <https://doi.org/10.1016/j.jamda.2014.11.003> PMID: [25544001](https://pubmed.ncbi.nlm.nih.gov/25544001/)
14. Tay R, Tan JY, Lim B, Hum AY, Simpson J, Preston N. Factors associated with the place of death of persons with advanced dementia: A systematic review of international literature with meta-analysis. *Palliat Med*. 2024;38(9):896–922. <https://doi.org/10.1177/02692163241265231> PMID: [39092850](https://pubmed.ncbi.nlm.nih.gov/39092850/)
15. Lin M-H, Chou Y-J. Exploring the influence of the impending death discharge tradition on home death rate in Taiwan. *J Chin Med Assoc*. 2024;87(8):746–53. <https://doi.org/10.1097/JCMA.0000000000001125> PMID: [38915140](https://pubmed.ncbi.nlm.nih.gov/38915140/)
16. Tricco AC, Lillie E, Zarin W, O'Brien KK, Colquhoun H, Levac D, et al. PRISMA extension for scoping reviews (PRISMA-ScR): checklist and explanation. *Ann Intern Med*. 2018;169(7):467–73. <https://doi.org/10.7326/M18-0850> PMID: [30178033](https://pubmed.ncbi.nlm.nih.gov/30178033/)
17. Munn Z, Peters MDJ, Stern C, Tufanaru C, McArthur A, Aromataris E. Systematic review or scoping review? Guidance for authors when choosing between a systematic or scoping review approach. *BMC Med Res Methodol*. 2018;18(1):143. <https://doi.org/10.1186/s12874-018-0611-x> PMID: [30453902](https://pubmed.ncbi.nlm.nih.gov/30453902/)
18. Arksey H, O'Malley L. Scoping studies: towards a methodological framework. *International Journal of Social Research Methodology*. 2005;8(1):19–32. <https://doi.org/10.1080/1364557032000119616>
19. Dementia Australia. Dementia language guidelines. <https://www.dementia.org.au/sites/default/files/2023-10/Dementia-language-guidelines.pdf>. 2021.
20. Pederson W. Senile dementia. *xPharm: The comprehensive pharmacology reference*. 2007. p. 1–18.
21. Pham MT, Rajić A, Greig JD, Sargeant JM, Papadopoulos A, McEwen SA. A scoping review of scoping reviews: advancing the approach and enhancing the consistency. *Res Synth Methods*. 2014;5(4):371–85. <https://doi.org/10.1002/jrsm.1123> PMID: [26052958](https://pubmed.ncbi.nlm.nih.gov/26052958/)
22. Peters MDJ, Godfrey CM, Khalil H, McInerney P, Parker D, Soares CB. Guidance for conducting systematic scoping reviews. *Int J Evid Based Healthc*. 2015;13(3):141–6. <https://doi.org/10.1097/XEB.0000000000000050> PMID: [26134548](https://pubmed.ncbi.nlm.nih.gov/26134548/)

23. Black H, Waugh C, Munoz-Arroyo R, Carnon A, Allan A, Clark D, et al. Predictors of place of death in South West Scotland 2000-2010: Retrospective cohort study. *Palliat Med.* 2016;30(8):764–71. <https://doi.org/10.1177/0269216315627122> PMID: [26857358](https://pubmed.ncbi.nlm.nih.gov/26857358/)
24. Dasch B, Bausewein C, Feddersen B. Place of death in patients with dementia and the association with comorbidities: A retrospective population-based observational study in Germany. *BMC Palliative Care.* 2018;17(1):1–13.
25. Dasch B, Lenz P. Place of death of older people with dementia : Epidemiological data from an observational study of places of death in Germany (2001, 2011, 2017). *Z Gerontol Geriatr.* 2022;55(8):673–9. <https://doi.org/10.1007/s00391-021-01976-7> PMID: [34591169](https://pubmed.ncbi.nlm.nih.gov/34591169/)
26. Page MJ, McKenzie JE, Bossuyt PM, Boutron I, Hoffmann TC, Mulrow CD, et al. The PRISMA 2020 statement: An updated guideline for reporting systematic reviews. *The BMJ.* 2021;372.
27. Fleming J, Calloway R, Perrels A, Farquhar M, Barclay S, Brayne C, et al. Dying comfortably in very old age with or without dementia in different care settings - a representative "older old" population study. *BMC Geriatr.* 2017;17(1):222. <https://doi.org/10.1186/s12877-017-0605-2> PMID: [28978301](https://pubmed.ncbi.nlm.nih.gov/28978301/)
28. Lo Y-T, Chi Y-C, Chang C-M, Kawachi I, Lu T-H. Changes in place of death trends among Asian American older adults with dementia in the United States from 2004 to 2021. *J Am Geriatr Soc.* 2023;71(11):3628–31. <https://doi.org/10.1111/jgs.18490> PMID: [37345740](https://pubmed.ncbi.nlm.nih.gov/37345740/)
29. Nakanishi M, Yamasaki S, Nishida A. In-hospital dementia-related deaths following implementation of the national dementia plan: observational study of national death certificates from 1996 to 2016. *BMJ Open.* 2018;8(12):1–8.
30. Basso C, Barbiellini Amidei C, Casotto V, Schievano E, Dotto M, Tiozzo Netti S, et al. Veneto Region dementia-related mortality during the COVID-19 pandemic: multiple causes of death and time series analysis. *Eur J Public Health.* 2023;33(2):190–5. <https://doi.org/10.1093/eurpub/ckad005> PMID: [36847686](https://pubmed.ncbi.nlm.nih.gov/36847686/)
31. Brosselin P, Duport N, Bloch J. Mortality with Alzheimer's disease and dementia in France, 2006. *Rev Epidemiol Sante Publique.* 2010;58(4):269–76. <https://doi.org/10.1016/j.respe.2010.04.007> PMID: [20667675](https://pubmed.ncbi.nlm.nih.gov/20667675/)
32. Chen R, Charpignon M-L, Raquib RV, Wang J, Meza E, Aschmann HE, et al. Excess mortality with alzheimer disease and related dementias as an underlying or contributing cause during the COVID-19 pandemic in the US. *JAMA Neurol.* 2023;80(9):919–28. <https://doi.org/10.1001/jamaneuro.2023.2226> PMID: [37459088](https://pubmed.ncbi.nlm.nih.gov/37459088/)
33. Cross SH, Kaufman BG, Taylor DH Jr, Kamal AH, Warraich HJ. Trends and factors associated with place of death for individuals with dementia in the United States. *J Am Geriatr Soc.* 2020;68(2):250–5. <https://doi.org/10.1111/jgs.16200> PMID: [31609481](https://pubmed.ncbi.nlm.nih.gov/31609481/)
34. Dasch B, Lenz P. The place of death of neurological patients with selected disease entities: data from an observational study on places of death from Germany. *Fortschr Neurol Psychiatr.* 2022;90(10):447–55. <https://doi.org/10.1055/a-1669-9177> PMID: [34844276](https://pubmed.ncbi.nlm.nih.gov/34844276/)
35. Hagen TP, Zelko E. Exploring end-of-life care for patients with breast cancer, dementia or heart failure: a register-based study of individual and institutional factors. *Healthcare (Basel).* 2024;12(9):943. <https://doi.org/10.3390/healthcare12090943> PMID: [38727500](https://pubmed.ncbi.nlm.nih.gov/38727500/)
36. Harada N, Koda M, Eguchi A, Hashizume M, Suzuki M, Nomura S. Changes in place of death among patients with dementia during the COVID-19 pandemic in Japan: a time-series analysis. *J Epidemiol.* 2024;34(10):493–7. <https://doi.org/10.2188/jea.JE20230279> PMID: [38403690](https://pubmed.ncbi.nlm.nih.gov/38403690/)
37. Houttekier D, Cohen J, Bilsen J, Addington-Hall J, Onwuteaka-Philipsen BD, Deliëns L. Place of death of older persons with dementia. A study in five European countries. *J Am Geriatr Soc.* 2010;58(4):751–6. <https://doi.org/10.1111/j.1532-5415.2010.02771.x> PMID: [20398157](https://pubmed.ncbi.nlm.nih.gov/20398157/)
38. Houttekier D, Reyniers T, Deliëns L, Van Den Noortgate N, Cohen J. Dying in hospital with dementia and pneumonia: a nationwide study using death certificate data. *Gerontology.* 2014;60(1):31–7. <https://doi.org/10.1159/000354378> PMID: [24192794](https://pubmed.ncbi.nlm.nih.gov/24192794/)
39. Jayaraman J, Joseph K. Determinants of place of death: a population-based retrospective cohort study. *BMC Palliat Care.* 2013;12:19. <https://doi.org/10.1186/1472-684X-12-19> PMID: [23634892](https://pubmed.ncbi.nlm.nih.gov/23634892/)
40. Khan AH, Ijaz E, Ubaid B, Eddaki I, Edhi M, Shah MN, et al. Analysis of alzheimer's disease-related mortality rates among the elderly populations across the United States: an analysis of demographic and regional disparities from 1999 to 2020. *Curr Alzheimer Res.* 2024;21(6):384–94. <https://doi.org/10.2174/0115672050338833240924113200> PMID: [39444182](https://pubmed.ncbi.nlm.nih.gov/39444182/)
41. Kim HD, Duberstein PR, Zafar A, Wu B, Lin H, Jarrin OF. Home health care and place of death in medicare beneficiaries with and without dementia. *Gerontologist.* 2024;64(11):gnae131. <https://doi.org/10.1093/geront/gnae131> PMID: [39392304](https://pubmed.ncbi.nlm.nih.gov/39392304/)
42. Koyama T, Sasaki M, Hagiya H, Zamami Y, Funahashi T, Ohshima A, et al. Place of death trends among patients with dementia in Japan: a population-based observational study. *Sci Rep.* 2019;9(1):20235. <https://doi.org/10.1038/s41598-019-56388-w> PMID: [31882673](https://pubmed.ncbi.nlm.nih.gov/31882673/)
43. Koyama T, Higashionna T, Maruo A, Ushio S, Zamami Y, Harada K, et al. Trends in places and causes of death among centenarians in Japan from 2006 to 2016. *Geriatr Gerontol Int.* 2022;22(8):675–80. <https://doi.org/10.1111/ggi.14416> PMID: [35739616](https://pubmed.ncbi.nlm.nih.gov/35739616/)
44. MacNeil Vroomen J, Bosmans JE, Holman R, van Rijn M, Buurman BM, van Hout HPJ, et al. Place of death with dementia—dutch people rarely die in the hospital. *J Am Geriatr Soc.* 2015;63(9):1961–2. <https://doi.org/10.1111/jgs.13637> PMID: [26389995](https://pubmed.ncbi.nlm.nih.gov/26389995/)
45. MacNeil Vroomen JL, Kjellstadli C, Allore HG, van der Steen JT, Husebo B. Reform influences location of death: Interrupted time-series analysis on older adults and persons with dementia. *PLoS One.* 2020;15(11):e0241132. <https://doi.org/10.1371/journal.pone.0241132> PMID: [33147248](https://pubmed.ncbi.nlm.nih.gov/33147248/)
46. MacNeil-Vroomen JL, van der Steen JT, Holman R, Monin JK, Buurman BM. Hospital deaths increased after reforms regardless of dementia status: an interrupted time-series analysis. *J Am Med Dir Assoc.* 2021;22(7):1507–11. <https://doi.org/10.1016/j.jamda.2020.12.013> PMID: [33453176](https://pubmed.ncbi.nlm.nih.gov/33453176/)
47. Martinsson L, Lundström S, Sundelöf J. Better quality of end-of-life care for persons with advanced dementia in nursing homes compared to hospitals: a Swedish national register study. *BMC Palliat Care.* 2020;19(1):135. <https://doi.org/10.1186/s12904-020-00639-5> PMID: [32847571](https://pubmed.ncbi.nlm.nih.gov/32847571/)

48. Masuchi Y, Jylhä M, Raitanen J, Aaltonen M. Changes in place of death among people with dementia in Finland between 1998 and 2013: A register study. *Alzheimers Dement (Amst)*. 2017;10:86–93. <https://doi.org/10.1016/j.dadm.2017.10.006> PMID: [29255788](https://pubmed.ncbi.nlm.nih.gov/29255788/)
49. Mitchell SL, Teno JM, Miller SC, Mor V. A national study of the location of death for older persons with dementia. *J Am Geriatr Soc*. 2005;53(2):299–305. <https://doi.org/10.1111/j.1532-5415.2005.53118.x> PMID: [15673356](https://pubmed.ncbi.nlm.nih.gov/15673356/)
50. Nakanishi M, Yamasaki S, Sakai M, Yoshii H, Ogawa A, Nishida A. Place of death from dementia as an underlying cause during the COVID-19 pandemic in Japan: a cross-sectional study from national death certificates. *Palliat Care Soc Pract*. 2023;17:26323524231193039. <https://doi.org/10.1177/26323524231193039> PMID: [37654728](https://pubmed.ncbi.nlm.nih.gov/37654728/)
51. Sleeman KE, Ho YK, Verne J, Gao W, Higginson IJ. Reversal of english trend towards hospital death in dementia: A population-based study of place of death and associated individual and regional factors, 2001-2010. *BMC Neurology*. 2014;14(1):1–9.
52. Wammes JD, Nakanishi M, Van Der Steen JT, Macneil Vroomen JL. Japanese national dementia plan is associated with a small shift in location of death: an interrupted time series analysis. *J Alzheimer's Disease*. 2021;83(2):791–7.
53. Wammes JD, Nakanishi M, van der Steen JT, MacNeil Vroomen JL. The revised medical care act is associated with a decrease in hospital death for the total Japanese older adult population regardless of dementia status: An interrupted time series analysis. *PLoS One*. 2022;17(3):e0264624. <https://doi.org/10.1371/journal.pone.0264624> PMID: [35239744](https://pubmed.ncbi.nlm.nih.gov/35239744/)
54. Xu W, Wu C, Fletcher J. Assessment of changes in place of death of older adults who died from dementia in the United States, 2000-2014: A time-series cross-sectional analysis. *BMC Public Health*. 2020;20(1):1–14.
55. Nguyen HQ, Vallejo JD, Macias M, Shiffman MG, Rosen R, Mowry V, et al. A mixed-methods evaluation of home-based primary care in dementia within an integrated system. *J Am Geriatr Soc*. 2022;70(4):1136–46. <https://doi.org/10.1111/jgs.17627> PMID: [34936090](https://pubmed.ncbi.nlm.nih.gov/34936090/)
56. Bessho Y, Deguchi Y, Yasui Y, Kusaka Y, Nagasawa S. Mortality, causes and places of death among the elderly with dementia in a community: results of a ten-year follow-up study. *Nihon Kosho Eisei Zasshi*. 2005;52(10):865–73. PMID: [16334407](https://pubmed.ncbi.nlm.nih.gov/16334407/)
57. Cabañero-Martínez MJ, Nolasco A, Melchor I, Fernández-Alcántara M, Cabrero-García J. Place of death and associated factors: a population-based study using death certificate data. *Eur J Public Health*. 2019;29(4):608–15. <https://doi.org/10.1093/eurpub/cky267> PMID: [30601984](https://pubmed.ncbi.nlm.nih.gov/30601984/)
58. Gomes B, Pinheiro MJ, Lopes S, de Brito M, Sarmiento VP, Lopes Ferreira P, et al. Risk factors for hospital death in conditions needing palliative care: Nationwide population-based death certificate study. *Palliat Med*. 2018;32(4):891–901. <https://doi.org/10.1177/0269216317743961> PMID: [29235927](https://pubmed.ncbi.nlm.nih.gov/29235927/)
59. Gotanda H, Zhang JJ, Xu H, Tsugawa Y. Site of death among individuals with and without dementia in 2016-2018. *J Am Geriatr Soc*. 2022;70(6):1865–7. <https://doi.org/10.1111/jgs.17704> PMID: [35176176](https://pubmed.ncbi.nlm.nih.gov/35176176/)
60. Thomas BM, Starr JM, Whalley LJ. Death certification in treated cases of presenile Alzheimer's disease and vascular dementia in Scotland. *Age Ageing*. 1997;26(5):401–6. <https://doi.org/10.1093/ageing/26.5.401> PMID: [9351485](https://pubmed.ncbi.nlm.nih.gov/9351485/)
61. Wiggins N, Droney J, Mohammed K, Riley J, Sleeman KE. Understanding the factors associated with patients with dementia achieving their preferred place of death: a retrospective cohort study. *Age Ageing*. 2019;48(3):433–9. <https://doi.org/10.1093/ageing/afz015> PMID: [30806452](https://pubmed.ncbi.nlm.nih.gov/30806452/)
62. Perrels AJ, Fleming J, Zhao J, Barclay S, Farquhar M, Buiting HM, et al. Place of death and end-of-life transitions experienced by very old people with differing cognitive status: retrospective analysis of a prospective population-based cohort aged 85 and over. *Palliat Med*. 2014;28(3):220–33. <https://doi.org/10.1177/0269216313510341> PMID: [24317193](https://pubmed.ncbi.nlm.nih.gov/24317193/)
63. Dasch B. The trend in places of death over two decades in the city of muenster - an observational study based on evaluated death certificates. *Gesundheitswesen*. 2024;86(4):322–9. <https://doi.org/10.1055/a-2125-5177> PMID: [37816382](https://pubmed.ncbi.nlm.nih.gov/37816382/)
64. Ganguli M, Rodriguez EG. Reporting of dementia on death certificates: a community study. *J Am Geriatr Soc*. 1999;47(7):842–9. <https://doi.org/10.1111/j.1532-5415.1999.tb03842.x> PMID: [10404929](https://pubmed.ncbi.nlm.nih.gov/10404929/)
65. Kjellstadli C, Husebø BS, Sandvik H, Flo E, Hunskaar S. Comparing unplanned and potentially planned home deaths: a population-based cross-sectional study. *BMC Palliat Care*. 2018;17(1):69. <https://doi.org/10.1186/s12904-018-0323-3> PMID: [29720154](https://pubmed.ncbi.nlm.nih.gov/29720154/)
66. Lane MJ, Davis DR, Cornman CB, Macera CA, Sanderson M. Location of death as an indicator of end-of-life costs for the person with dementia. *American Journal of Alzheimer's Disease*. 1998;13(4):208–10. <https://doi.org/10.1177/153331759801300408>
67. Oosterveld-Vlug MG, Heins MJ, Boddaert MSA, Engels Y, Heide A van der, Onwuteaka-Philipsen BD, et al. Evaluating quality of care at the end of life and setting best practice performance standards: A population-based observational study using linked routinely collected administrative databases. *BMC Palliative Care*. 2022;21(1):1–9.
68. Quinn KL, Wegier P, Stukel TA, Huang A, Bell CM, Tanuseputro P. Comparison of palliative care delivery in the last year of life between adults with terminal noncancer illness or cancer. *JAMA Netw Open*. 2021;4(3):e210677. <https://doi.org/10.1001/jamanetworkopen.2021.0677> PMID: [33662135](https://pubmed.ncbi.nlm.nih.gov/33662135/)
69. Teno J, Gozalo P, Bynum J, Leland N, Miller S, Morden N, et al. Change in End-of-Life care for Medicare beneficiaries. Site of death, place of care, and health care transitions in 2000, 2005, and 2009. *JAMA*. 2013;309(5):470–7.
70. Zafeiridi E, McMichael AJ, Passmore AP, McGuinness B. Factors influencing transition to care homes for people with dementia in Northern Ireland. *Alzheimers Dement (N Y)*. 2021;7(1):e12120. <https://doi.org/10.1002/trc2.12120> PMID: [33748397](https://pubmed.ncbi.nlm.nih.gov/33748397/)
71. Teno JM, Gozalo PL, Bynum JPW, Leland NE, Miller SC, Morden NE, et al. Change in end-of-life care for Medicare beneficiaries: site of death, place of care, and health care transitions in 2000, 2005, and 2009. *JAMA*. 2013;309(5):470–7. <https://doi.org/10.1001/jama.2013.1001>

72. Owusu PA, Sarkodie SA, Pedersen PA. Relationship between mortality and health care expenditure: Sustainable assessment of health care system. *PLoS One*. 2021;16(2):e0247413. <https://doi.org/10.1371/journal.pone.0247413> PMID: [33626059](https://pubmed.ncbi.nlm.nih.gov/33626059/)
73. Blanchet T, Chancel L, Gethin A. Why is Europe more equal than the United States?. *American Economic Journal: Applied Economics*. 2022;14(4):480–518. <https://doi.org/10.1257/app.20200703>
74. Polcyn J, Voumik LC, Ridwan M, Ray S, Vovk V. Evaluating the influences of health expenditure, energy consumption, and environmental pollution on life expectancy in Asia. *Int J Environ Res Public Health*. 2023;20(5):4000. <https://doi.org/10.3390/ijerph20054000> PMID: [36901013](https://pubmed.ncbi.nlm.nih.gov/36901013/)
75. Unruh L, Allin S, Marchildon G, Burke S, Barry S, Siersbaek R, et al. A comparison of 2020 health policy responses to the COVID-19 pandemic in Canada, Ireland, the United Kingdom and the United States of America. *Health Policy*. 2022;126(5):427–37. <https://doi.org/10.1016/j.healthpol.2021.06.012> PMID: [34497031](https://pubmed.ncbi.nlm.nih.gov/34497031/)
76. Adair T. Who dies where? Estimating the percentage of deaths that occur at home. *BMJ Glob Health*. 2021;6(9):e006766. <https://doi.org/10.1136/bmjgh-2021-006766> PMID: [34479953](https://pubmed.ncbi.nlm.nih.gov/34479953/)
77. Rao SR, Salins N, Joshi U, Patel J, Remawi BN, Simha S, et al. Palliative and end-of-life care in intensive care units in low- and middle-income countries: A systematically constructed scoping review. *J Crit Care*. 2022;71:154115. <https://doi.org/10.1016/j.jcrc.2022.154115> PMID: [35907272](https://pubmed.ncbi.nlm.nih.gov/35907272/)
78. Reid E, Ghoshal A, Khalil A, Jiang J, Normand C, Brackett A, et al. Out-of-pocket costs near end of life in low- and middle-income countries: A systematic review. *PLOS Glob Public Health*. 2022;2(1):e0000005. <https://doi.org/10.1371/journal.pgph.0000005> PMID: [36962095](https://pubmed.ncbi.nlm.nih.gov/36962095/)
79. Brink P, Kelley ML. Death in long-term care: a brief report examining factors associated with death within 31 days of assessment. *Palliat Care*. 2015;9:1–5. <https://doi.org/10.4137/PCRT.S20347> PMID: [25674000](https://pubmed.ncbi.nlm.nih.gov/25674000/)
80. Flacker JM, Kiely DK. A practical approach to identifying mortality-related factors in established long-term care residents. *J Am Geriatr Soc*. 1998;46(8):1012–5. <https://doi.org/10.1111/j.1532-5415.1998.tb02759.x> PMID: [9706893](https://pubmed.ncbi.nlm.nih.gov/9706893/)
81. Aaltonen MS, Forma LP, Pulkki JM, Raitanen JA, Rissanen P, Jylhä MK. The joint impact of age at death and dementia on long-term care use in the last years of life: changes from 1996 to 2013 in Finland. *Gerontol Geriatr Med*. 2019;5:2333721419870629. <https://doi.org/10.1177/2333721419870629> PMID: [31489341](https://pubmed.ncbi.nlm.nih.gov/31489341/)
82. Huyer G, Brown CRL, Spruin S, Hsu AT, Fisher S, Manuel DG, et al. Five-year risk of admission to long-term care home and death for older adults given a new diagnosis of dementia: a population-based retrospective cohort study. *CMAJ*. 2020;192(16):E422–30. <https://doi.org/10.1503/cmaj.190999> PMID: [32312824](https://pubmed.ncbi.nlm.nih.gov/32312824/)
83. Carr D, Boerner K, Moorman S. Bereavement in the time of coronavirus: unprecedented challenges demand novel interventions. *J Aging Soc Policy*. 2020;32(4–5):425–31. <https://doi.org/10.1080/08959420.2020.1764320> PMID: [32419667](https://pubmed.ncbi.nlm.nih.gov/32419667/)
84. Ginggeaw S, LeBlanc R. The determinants of actual place of death among noncancer patients with end-stage chronic health conditions: a scoping review. *Palliat Care Soc Pract*. 2024;18:26323524241236964. <https://doi.org/10.1177/26323524241236964> PMID: [38510469](https://pubmed.ncbi.nlm.nih.gov/38510469/)
85. Yamout R, Hanna J, El Asmar R, Beydoun H, Rahm M, Osman H. Preferred place of death for patients with terminal illness: A literature review. *Progress in Palliative Care*. 2021;30(2):101–10. <https://doi.org/10.1080/09699260.2021.1961985>
86. Lei L, Gerlach LB, Powell VD, Maust DT. Caregiver support and place of death among older adults. *J Am Geriatr Soc*. 2021;69(5):1221–30. <https://doi.org/10.1111/jgs.17055> PMID: [33590479](https://pubmed.ncbi.nlm.nih.gov/33590479/)
87. Ailshire J, Osuna M, Wilkens J, Lee J. Family Caregiving and Place of Death: Insights From Cross-national Analysis of the Harmonized End-of-Life Data. *J Gerontol B Psychol Sci Soc Sci*. 2021;76(Suppl 1):S76–85. <https://doi.org/10.1093/geronb/gbaa225> PMID: [33378449](https://pubmed.ncbi.nlm.nih.gov/33378449/)
88. Chuzi S, Molsberry R, McCabe ME, Yancy CW, Ogunseitan A, Allen NB, et al. Distribution in Place of Death for COVID-19-Related Mortality in the United States. *J Am Geriatr Soc*. 2020;68(9):1917–8. <https://doi.org/10.1111/jgs.16721> PMID: [32643800](https://pubmed.ncbi.nlm.nih.gov/32643800/)
89. Pinzon LCE, Claus M, Perrar KM, Zepf KI, Letzel S, Weber M. Dying with dementia: symptom burden, quality of care, and place of death. *Dtsch Arztebl Int*. 2013;110(12):195–202. <https://doi.org/10.3238/arztebl.2013.0195> PMID: [23589742](https://pubmed.ncbi.nlm.nih.gov/23589742/)
90. Cai J, Zhang L, Guerriere D, Coyte PC. Congruence between preferred and actual place of death for those in receipt of home-based palliative care. *J Palliat Med*. 2020;23(11):1460–7. <https://doi.org/10.1089/jpm.2019.0582> PMID: [32286904](https://pubmed.ncbi.nlm.nih.gov/32286904/)
91. Neergaard MA, Brunoe AH, Skorstengaard MH, Nielsen MK. What socio-economic factors determine place of death for people with life-limiting illness? A systematic review and appraisal of methodological rigour. *Palliat Med*. 2019;33(8):900–25. <https://doi.org/10.1177/0269216319847089> PMID: [31187687](https://pubmed.ncbi.nlm.nih.gov/31187687/)
92. Houttekier D, Reyniers T, Deliens L, Van Den Noortgate N, Cohen J. Dying in hospital with dementia and pneumonia: a nationwide study using death certificate data. *Gerontology*. 2014;60(1):31–7. <https://doi.org/10.1159/000354378> PMID: [24192794](https://pubmed.ncbi.nlm.nih.gov/24192794/)
93. Cohen J, Bilsen J, Hoof P, Deboosere P, van der Wal G, Deliens L. Dying at home or in an institution using death certificates to explore the factors associated with place of death. *Health Policy*. 2006;78(2–3):319–29. <https://doi.org/10.1016/j.healthpol.2005.11.003> PMID: [16343687](https://pubmed.ncbi.nlm.nih.gov/16343687/)
94. Gisquet E, Julliard S, Geoffroy-Perez B. Do social factors affect the place of death? Analysis of home versus institutional death over 20 years. *J Public Health (Oxf)*. 2016;38(4):e472–9. <https://doi.org/10.1093/pubmed/fdv167> PMID: [28158559](https://pubmed.ncbi.nlm.nih.gov/28158559/)
95. Houttekier D, Cohen J, Surkyn J, Deliens L. Study of recent and future trends in place of death in Belgium using death certificate data: A shift from hospitals to care homes. *Palliative Med*. 2011;26(4):412.
96. Jiménez-Puente A, Alegría JG. Geographical distribution and evolution of deaths in hospitals in Spain, 1996–2015. *Revista Clínica Española (English Edition)*. 2018;218(6):285–92.

97. Leite AKF, Ribeiro KB. Older adults with cancer in the city of São Paulo: What factors determine the place of death?. *Revista de Saude Publica*. 2018;52:1–10.
98. Poulouse JV, Do YK, Neo PSH. Association between referral-to-death interval and location of death of patients referred to a hospital-based specialist palliative care service. *J Pain Symptom Manage*. 2013;46(2):173–81. <https://doi.org/10.1016/j.jpainsymman.2012.08.009> PMID: [23177723](https://pubmed.ncbi.nlm.nih.gov/23177723/)
99. Higginson IJ, Sarmiento VP, Calanzani N, Benalia H, Gomes B. Dying at home--is it better: a narrative appraisal of the state of the science. *Palliat Med*. 2013;27(10):918–24. <https://doi.org/10.1177/0269216313487940> PMID: [23698451](https://pubmed.ncbi.nlm.nih.gov/23698451/)
100. Higginson IJ, Costantini M. Dying with cancer, living well with advanced cancer. *Eur J Cancer*. 2008;44(10):1414–24. <https://doi.org/10.1016/j.ejca.2008.02.024> PMID: [18342501](https://pubmed.ncbi.nlm.nih.gov/18342501/)
101. Cable-Williams B, Wilson DM. Dying and death within the culture of long-term care facilities in Canada. *Int J Older People Nurs*. 2017;12(1):10.1111/opn.12125. <https://doi.org/10.1111/opn.12125> PMID: [27431427](https://pubmed.ncbi.nlm.nih.gov/27431427/)
102. Cohen J, Bilsen J, Miccinesi G, Löfmark R, Addington-Hall J, Kaasa S, et al. Using death certificate data to study place of death in 9 European countries: opportunities and weaknesses. *BMC Public Health*. 2007;7:283. <https://doi.org/10.1186/1471-2458-7-283> PMID: [17922894](https://pubmed.ncbi.nlm.nih.gov/17922894/)
103. Tay R, Tan JYS, Hum AYM. Factors associated with family caregiver burden of home-dwelling patients with advanced dementia. *J Am Med Dir Assoc*. 2022;23(7):1248–56. <https://doi.org/10.1016/j.jamda.2021.09.012> PMID: [34634231](https://pubmed.ncbi.nlm.nih.gov/34634231/)
104. Bell CL, Somogyi-Zalud E, Masaki KH. Factors associated with congruence between preferred and actual place of death. *J Pain Symptom Manage*. 2010;39(3):591–604. <https://doi.org/10.1016/j.jpainsymman.2009.07.007> PMID: [20116205](https://pubmed.ncbi.nlm.nih.gov/20116205/)
